# Supplementary material for: Synthesis and isolation of a stable, axially-chiral seven-membered N-heterocyclic carbene
Source: Royal Society of Chemistry journal article supplement (doi:10.1039/b902460c), 2009-01-01
Supplement: b902460c.pdf [file b902460c.pdf]

*Electronic Supplementary Information for*

**Synthesis and Isolation of a Stable, Axially-Chiral 7-Membered N-Heterocyclic Carbene**

**Christopher C. Scarborough, Ilia A. Guzei, and Shannon S. Stahl**

|                                                         |    |
|---------------------------------------------------------|----|
| Synthetic routes and characterization data .....        | 1  |
| FTIR spectrum of <b>6</b> .....                         | 5  |
| NMR Spectra of new compounds .....                      | 6  |
| X-ray crystallographic data for compound <b>4</b> ..... | 10 |

**General considerations.** Complexes **3<sup>OPh</sup>**, **4**, and **5** were synthesized in a glove box using dry solvents. NMR spectra were recorded on 300 MHz or 500 MHz spectrometers; <sup>1</sup>H NMR spectra are referenced to TMS (0.0 ppm), while <sup>13</sup>C NMR spectra were referenced to C<sub>6</sub>D<sub>6</sub> (128.06 ppm). The FTIR spectrum of **6** (0.025 M in C<sub>6</sub>D<sub>6</sub>) was recorded on an Hamilton Sundstrand Analect ChemEye FTIR analyzer. Flash chromatography was performed on silica gel 60 (particle size 0.040-0.063mm, 230-400 mesh ASTM, purchased from Sorbent Technology). Complexes **3<sup>OMe</sup>** and **3<sup>OrBu</sup>** have been reported previously.<sup>1</sup>

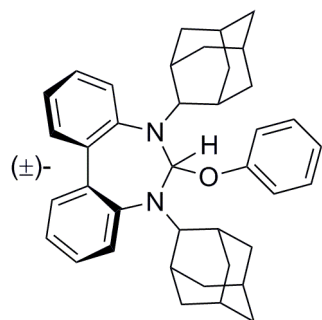

**3<sup>OPh</sup>**. Amidinium salt (1.00 g, 1.822 mmol) was combined with 279 mg NaOPh (2.41 mmol) in a glove box. 10 mL dry Et<sub>2</sub>O was added, and the suspension stirred until it had clarified (about 20 minutes).

<sup>1</sup> C. C. Scarborough, M. J. W. Grady, I. A. Guzei, B. A. Gandhi, E. E. Bunel and S. S. Stahl, *Angew. Chem. Int. Ed.*, 2005, **44**, 5269-5272.

The solution was dried under vacuum, and the residue was suspended in 10 mL pentane. This suspension was filtered over celite and the filtrate was dried under vacuum to afford 1.00 g **3**<sup>OPh</sup> as a white powder, 99% yield. This material used without further purification for the synthesis of free NHC **4**. <sup>1</sup>H NMR (C<sub>6</sub>D<sub>6</sub>, 297K, 300 MHz): δ 1.07 (d, *J* = 12.6 Hz, 1H), δ 1.16 (d, *J* = 12.6 Hz, 2H), δ 1.24 - 1.29 (m, 2H), δ 1.25 (s, 4H), δ 1.43 - 1.60 (m, 12H), δ 1.63 (s, 1H), δ 1.73 (s, 1H), δ 1.85 (d, *J* = 12.6 Hz, 1H), δ 1.97 (s, 2H), δ 2.20 (d, *J* = 12.6 Hz, 1H), δ 2.28 (s, 1H), δ 3.41 (s, 1H), δ 3.90 (s, 1H), δ 6.47 (s, 1H), δ 6.87 (t, *J* = 7.0 Hz, 1H), δ 7.11 (t, *J* = 7.0 Hz, 1H), δ 7.18 - 7.25 (m, 5H), δ 7.34 (d, *J* = 8.4 Hz, 2H), δ 7.43 (d, *J* = 7.7 Hz, 2H), δ 7.46 (d, *J* = 7.7 Hz, 1H). <sup>13</sup>C NMR (C<sub>6</sub>D<sub>6</sub>, 297K, 300 MHz): δ 27.4, δ 27.5, δ 29.0, δ 29.8, δ 30.8, δ 31.4, δ 31.6, δ 31.9, δ 32.1, δ 32.7, δ 36.7, δ 37.1, δ 37.5, δ 37.6, δ 37.9, δ 38.9, δ 59.5, δ 61.1, δ 104.9, δ 117.2, δ 122.0, δ 124.4, δ 126.3, δ 126.4, δ 127.2, δ 127.56, δ 127.63, δ 128.3, δ 129.2, δ 129.9, δ 139.3, δ 143.2, δ 145.8, δ 158.9.

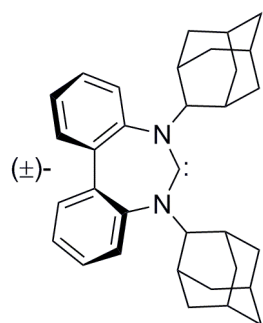

**4**. Complex **2** (201 mg, 0.365 mmol) was combined with 46 mg NaOPh (1.09 equiv) in 6 mL Et<sub>2</sub>O in a glove box. This solution was stirred for 30 minutes, after which the solvent was removed under vacuum. Pentane (~3 mL) was added and removed in vacuo 3x to drive off any remaining Et<sub>2</sub>O. The residue was suspended in 6 mL pentane, and the off-white precipitate

was removed by filtration through celite. 1.05 equivalents of *n*-BuLi (2.0 M in pentane) was added in one portion via syringe. Immediately, a white solid formed and the solution turned bright yellow. After stirring at room temperature for 20 minutes, the solvent was removed in vacuo and benzene was added to the residue. Filtration over celite afforded free NHC **4** in 87% yield as a yellow solid. Crystals of **4** suitable for X-ray diffraction analysis were obtained by slow evaporation of a benzene solution of **4** under a nitrogen atmosphere. NMR (C<sub>6</sub>D<sub>6</sub>, 297K,

300 MHz):  $\delta$  1.09 (s, 2H),  $\delta$  1.44 - 1.73 (m, 16H),  $\delta$  1.90 (s, 4H),  $\delta$  2.09 (s, 2H),  $\delta$  2.35 (d,  $J$  = 12.3 Hz, 2H),  $\delta$  3.37 (s, 2H),  $\delta$  4.49 (s, 2H),  $\delta$  6.95 - 7.02 (m, 4H),  $\delta$  7.05 - 7.08 (m, 2H),  $\delta$  7.20 - 7.23 (m, 2H).  $^{13}\text{C}$  NMR ( $\text{CDCl}_3$ , 297K, 300 MHz):  $\delta$  28.0,  $\delta$  30.4,  $\delta$  31.0,  $\delta$  31.1,  $\delta$  32.6,  $\delta$  37.2,  $\delta$  37.8,  $\delta$  38.2,  $\delta$  64.5,  $\delta$  121.8,  $\delta$  125.2,  $\delta$  127.2,  $\delta$  137.5,  $\delta$  146.1 (carbene carbon not detected).

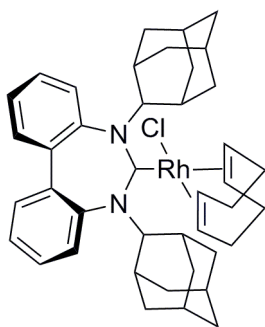

**5.** Free NHC **4** (179 mg, 0.387 mmol) and  $[\text{Rh}(\text{COD})\text{Cl}]_2$  (83.3 mg, 0.44 equiv) were combined in dry THF in a glove box. The deep orange solution was stirred at room temperature for 5 h, after which time the reaction mixture was removed from the glove box. Removal of solvent on a rotary evaporator followed by purification of product by column

chromatography ( $\text{SiO}_2$ , 20% to 50% (gradient)  $\text{Et}_2\text{O}$  in hexanes) afforded **5** as a bright yellow solid in 70% yield. NMR ( $\text{C}_6\text{D}_6$ , 297K, 300 MHz):  $\delta$  0.66 (d,  $J$  = 12.1 Hz, 1H),  $\delta$  0.98 - 1.88 (m, 24H),  $\delta$  1.96 - 2.12 (m, 2H),  $\delta$  2.12 - 2.36 (m, 6H),  $\delta$  2.54 - 2.74 (m, 3H),  $\delta$  3.56 (m, 1H),  $\delta$  3.86 (m, 1H),  $\delta$  4.90 (s, 1H),  $\delta$  4.95 (s, 1H),  $\delta$  5.59 (m, 2H),  $\delta$  6.97 - 7.33 (m, 7H),  $\delta$  7.93 (dd,  $J$  = 7.5, 1.7 Hz, 1H).  $^{13}\text{C}$  NMR ( $\text{C}_6\text{D}_6$ , 297K, 75 MHz):  $\delta$  20.9,  $\delta$  25.6,  $\delta$  27.4,  $\delta$  27.7,  $\delta$  27.9,  $\delta$  28.5,  $\delta$  28.8,  $\delta$  30.8,  $\delta$  31.1,  $\delta$  31.2,  $\delta$  31.4,  $\delta$  31.9,  $\delta$  32.0,  $\delta$  33.2,  $\delta$  33.8,  $\delta$  35.6,  $\delta$  37.8,  $\delta$  38.09,  $\delta$  38.14,  $\delta$  38.6,  $\delta$  38.8,  $\delta$  39.2,  $\delta$  66.0 (d,  $J$  = 14.9 Hz),  $\delta$  66.9,  $\delta$  68.8 (d,  $J$  = 15.8 Hz),  $\delta$  71.4,  $\delta$  100.6 (d,  $J$  = 5.6 Hz),  $\delta$  102.6 (d,  $J$  = 5.4 Hz),  $\delta$  116.2,  $\delta$  124.9,  $\delta$  126.4,  $\delta$  127.27,  $\delta$  127.32,  $\delta$  127.5,  $\delta$  129.7,  $\delta$  127.3 (d,  $J$  = 15.4 Hz),  $\delta$  147.2 (d,  $J$  = 9.8 Hz),  $\delta$  158.0. HRMS (ESI-EMM):  $m/z$  =  $([\text{M} - \text{Cl}]^+)$  673.3020,  $\Delta < 1$  ppm.

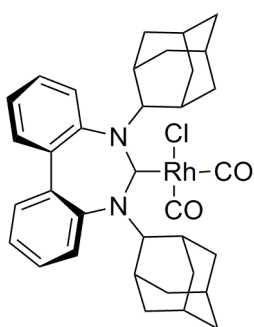

**6.** The NHC-Rh complex **5** was dissolved in benzene- $d_6$  (0.025 M solution) in a thick-walled glass pressure vessel. The vessel was purged with CO gas and pressurized to 60 psi with CO gas. This solution was vigorously stirred for 2h under 60 psi CO pressure, after which time the

sample was removed from the CO atmosphere and  $^1\text{H}$  and  $^{13}\text{C}$  NMR and IR spectra were quickly obtained of the crude reaction mixture. The NMR spectra revealed complete conversion of **5** into the Rh-dicarbonyl complex **6** together with the release of free COD. The instability of complex **6** in the absence of a CO atmosphere prevented isolation.  $^1\text{H}$  NMR ( $\text{C}_6\text{D}_6$ , 297K, 300 MHz):  $\delta$  1.06 - 2.15 (m, 26H),  $\delta$  2.21 (8H, free COD),  $\delta$  3.81 (s, 1H),  $\delta$  4.23 (s, 1H),  $\delta$  4.64 (s, 1H),  $\delta$  5.58 (s, 4H, free COD),  $\delta$  5.61 (s, 1H),  $\delta$  6.68 - 6.71 (m, 1H),  $\delta$  6.86 - 7.08 (m, 5H),  $\delta$  7.22 (dd,  $J = 7.6$ , 1.4 Hz, 1H),  $\delta$  7.75 (dd,  $J = 7.6$ , 1.8 Hz, 1H).  $^{13}\text{C}$  NMR ( $\text{C}_6\text{D}_6$ , 297K, 75 MHz):  $\delta$  21.4,  $\delta$  27.0,  $\delta$  27.1,  $\delta$  27.2,  $\delta$  28.4,  $\delta$  30.4,  $\delta$  30.5,  $\delta$  30.7,  $\delta$  31.4,  $\delta$  31.5,  $\delta$  36.9,  $\delta$  37.1,  $\delta$  37.4,  $\delta$  37.48,  $\delta$  37.52,  $\delta$  68.0,  $\delta$  68.3,  $\delta$  115.6,  $\delta$  120.6,  $\delta$  125.4,  $\delta$  126.4,  $\delta$  126.9,  $\delta$  127.2 (d,  $J = 7.1$  Hz),  $\delta$  127.5 (d,  $J = 8.2$  Hz),  $\delta$  127.7 (d,  $J = 10.4$  Hz),  $\delta$  128.8,  $\delta$  130.0 (d,  $J = 57.8$  Hz),  $\delta$  136.8 (d,  $J = 90.3$  Hz),  $\delta$  137.8,  $\delta$  147.2 (d,  $J = 46.3$  Hz),  $\delta$  184.2 (d,  $J = 77.1$  Hz),  $\delta$  187.4 (d,  $J = 52.9$  Hz).

Infrared spectrum (FTIR) of **6** (0.025 M in  $\text{C}_6\text{D}_6$ ): (carbonyl stretching frequencies  $1988.25\text{ cm}^{-1}$  and  $2077.92\text{ cm}^{-1}$ ):

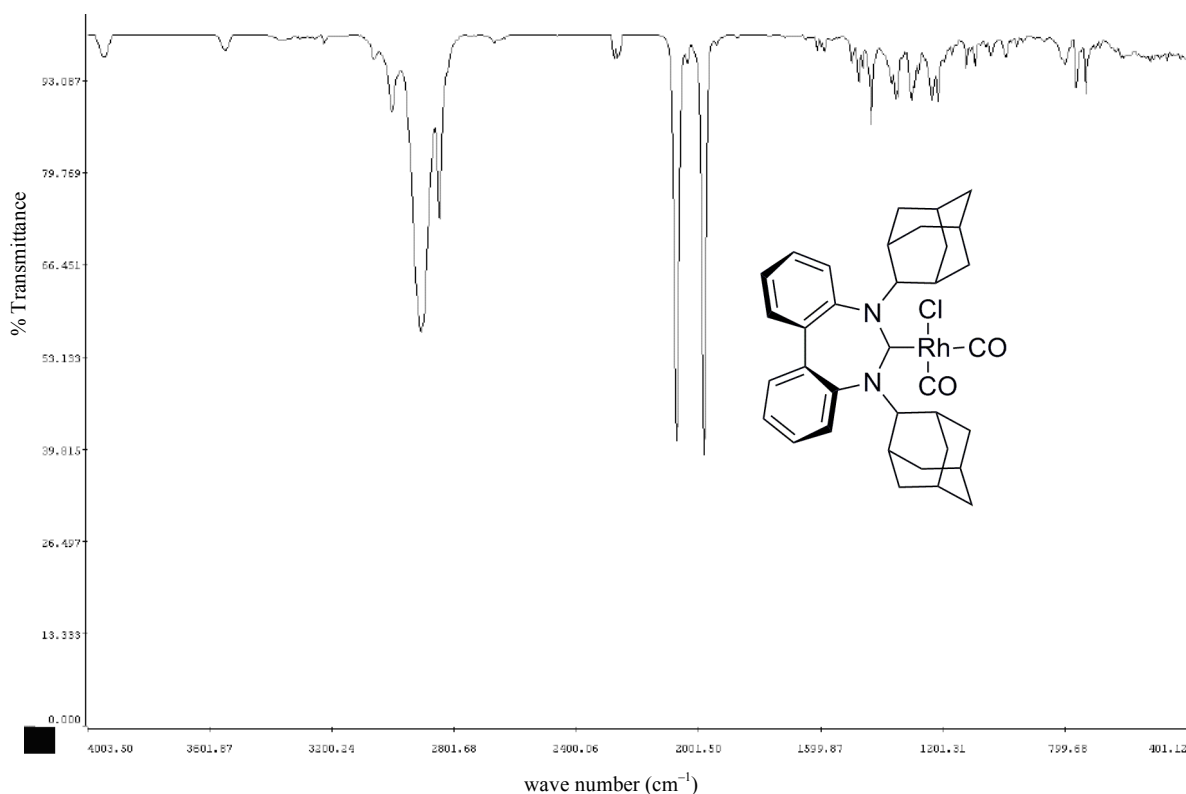

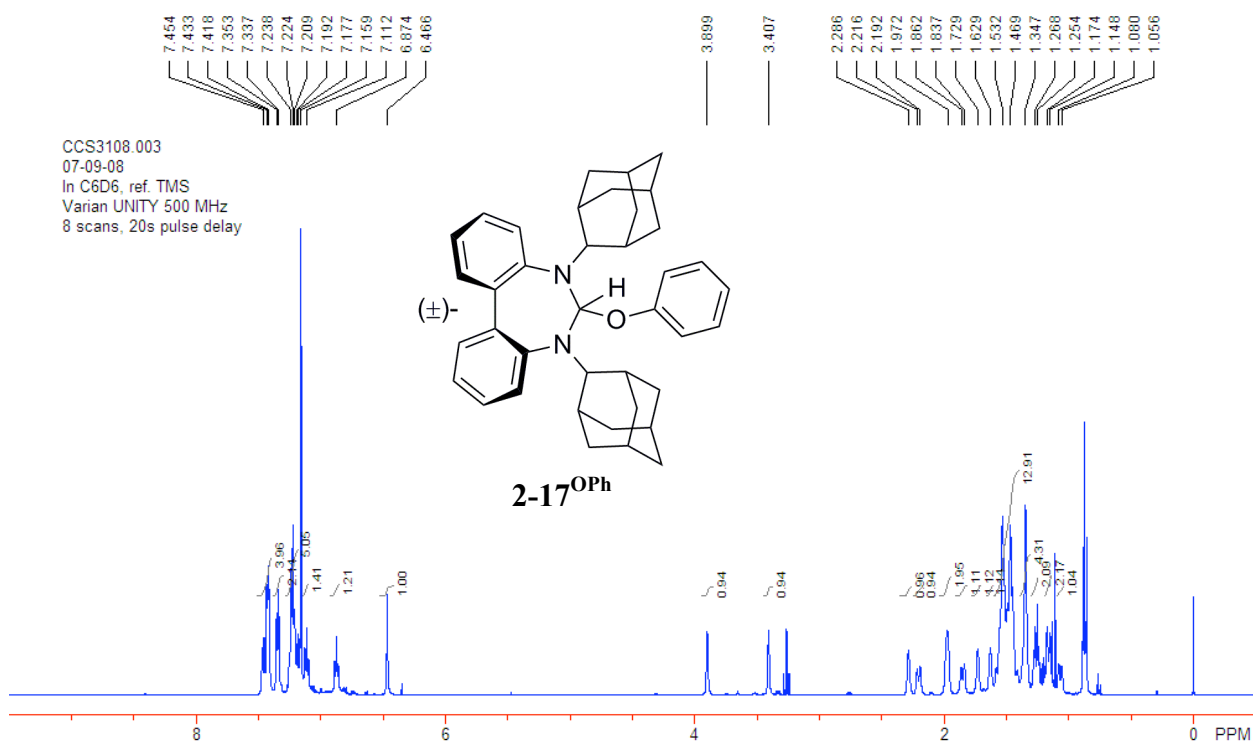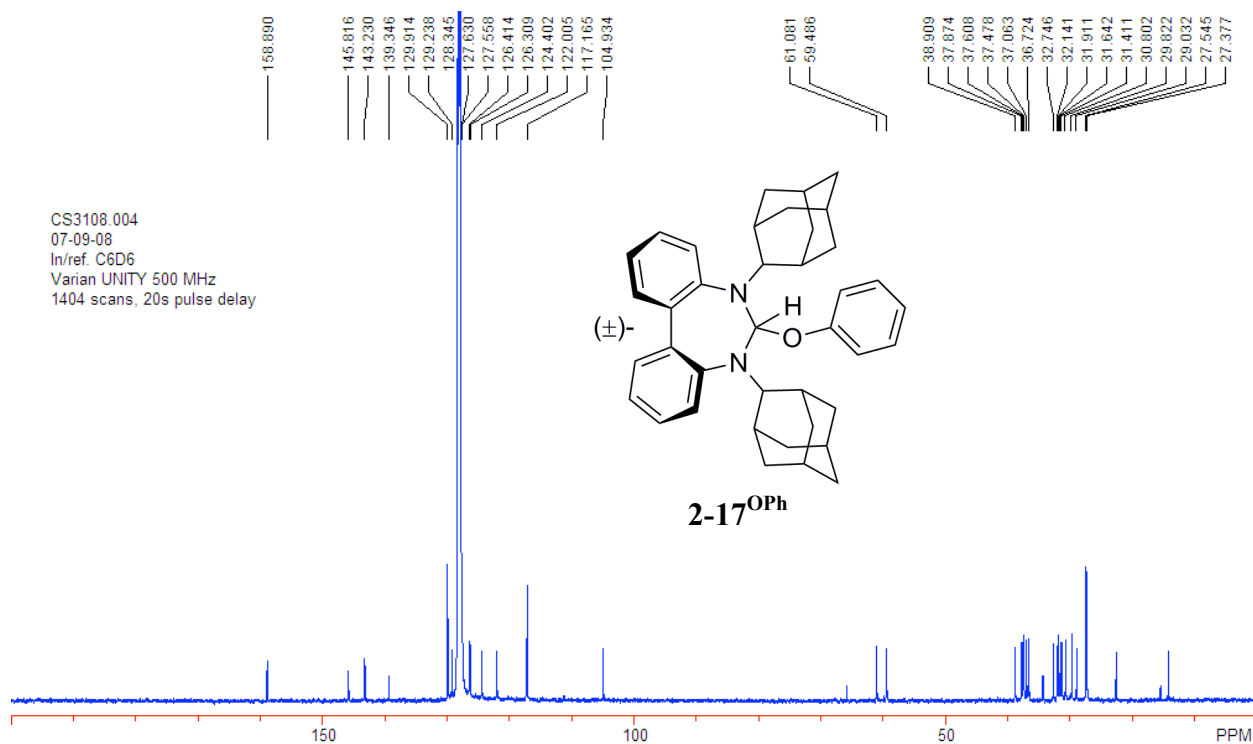

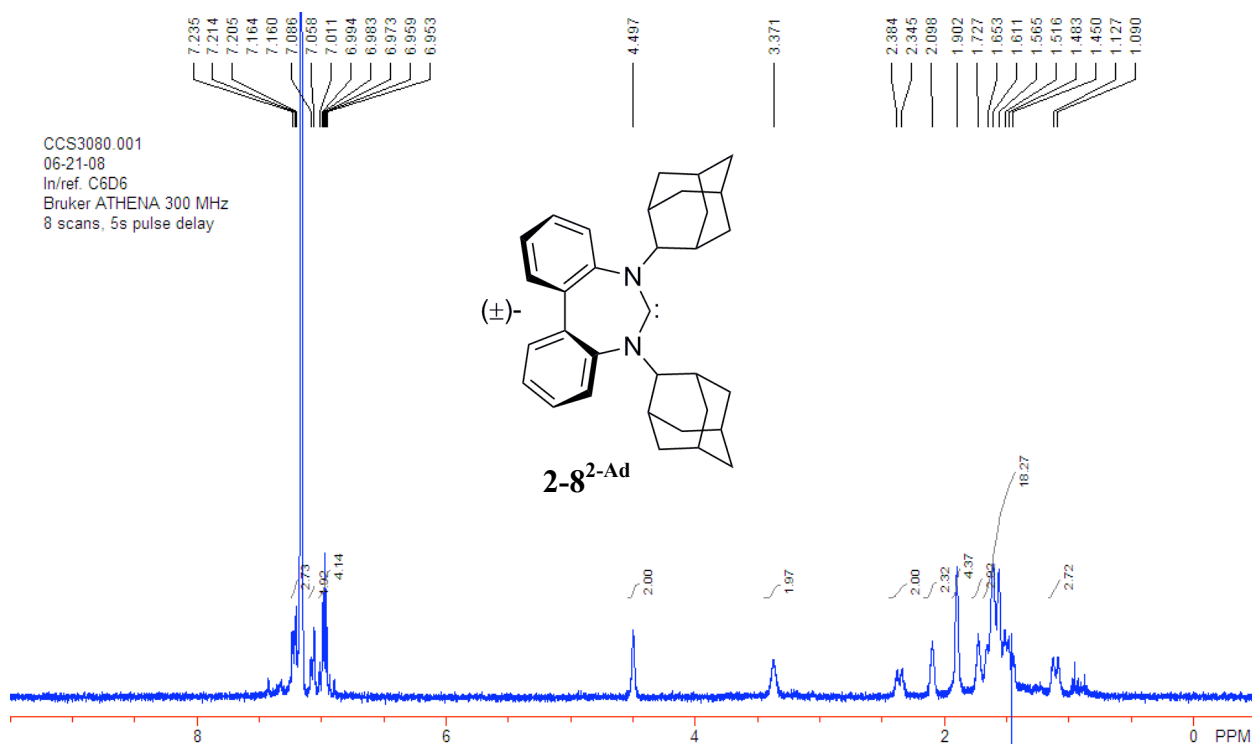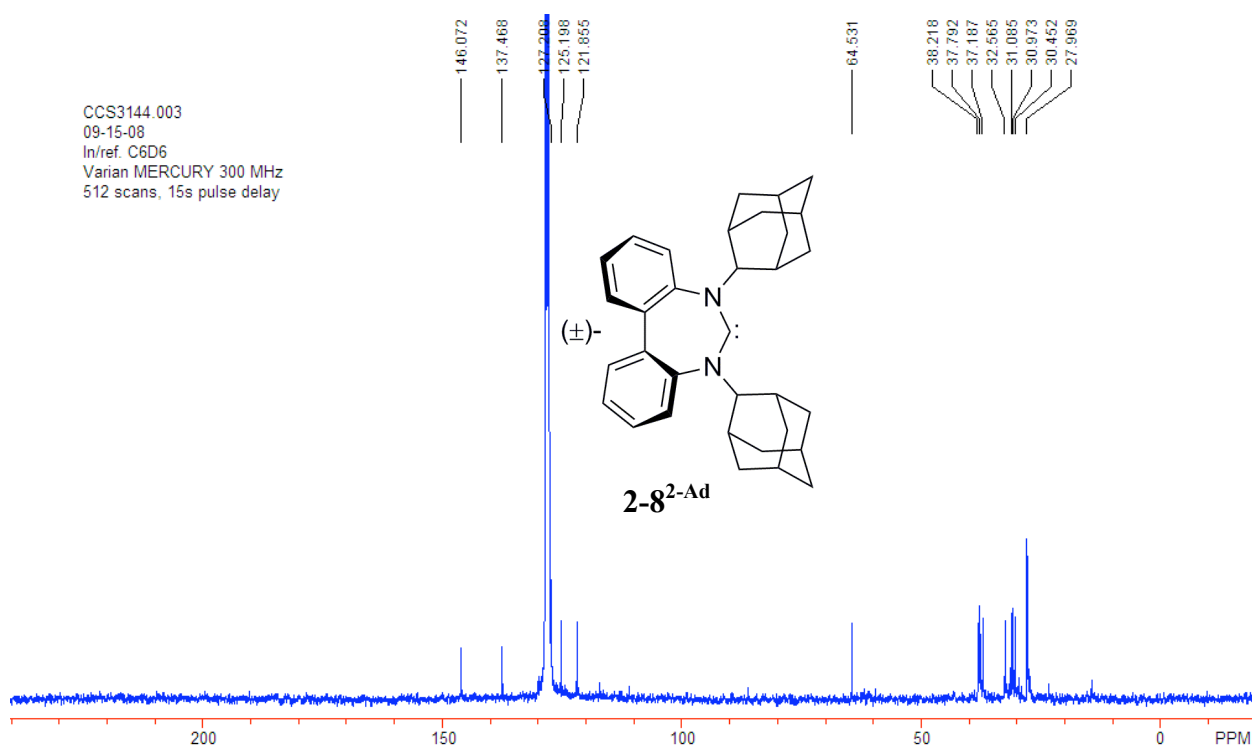

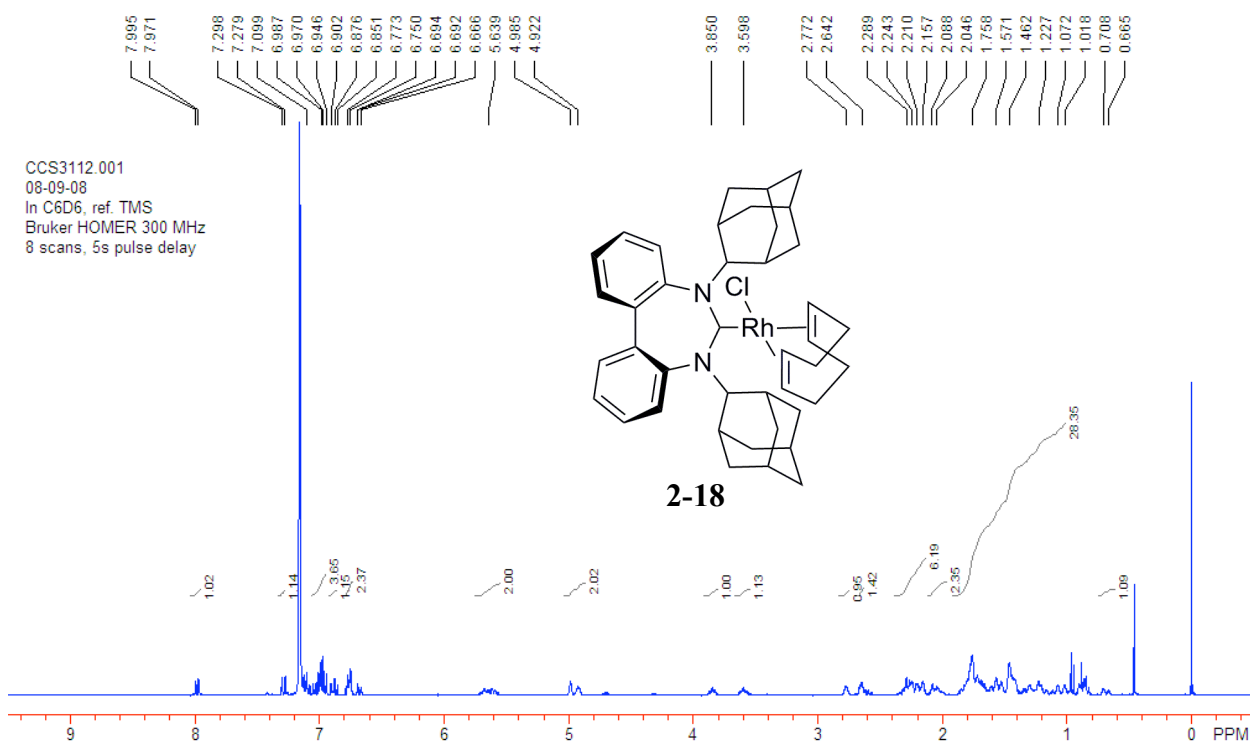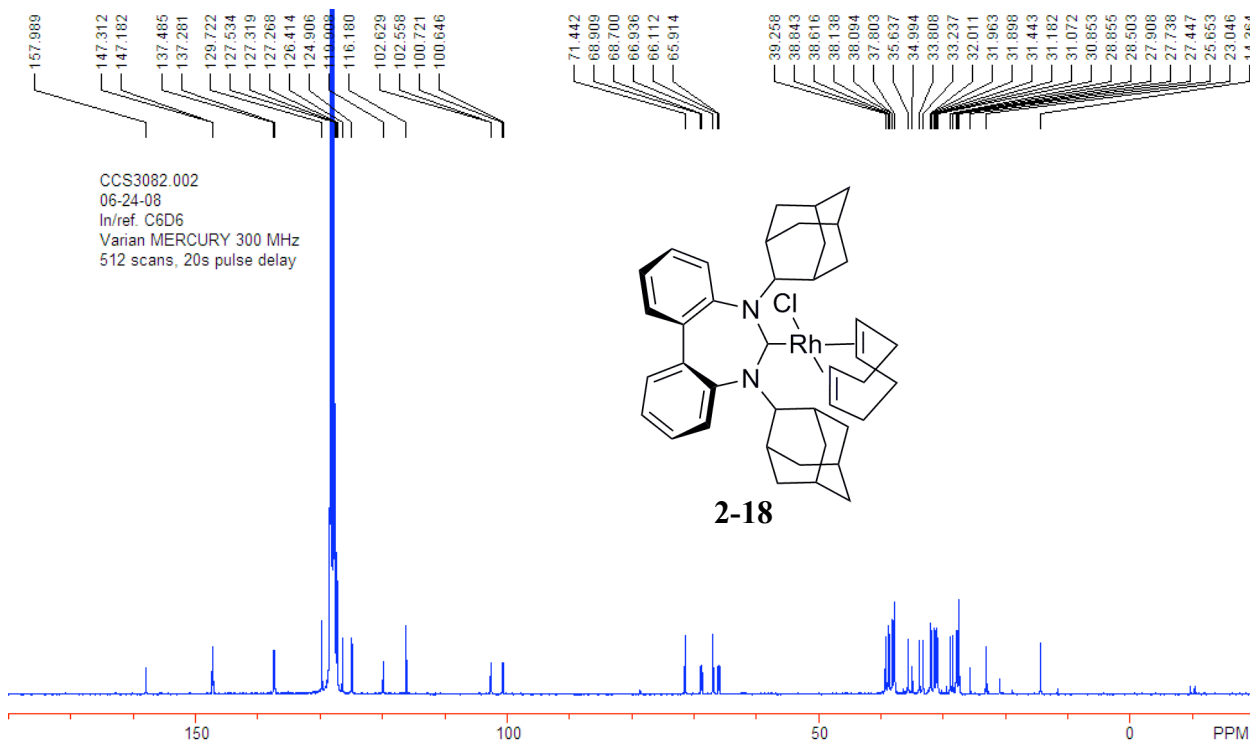

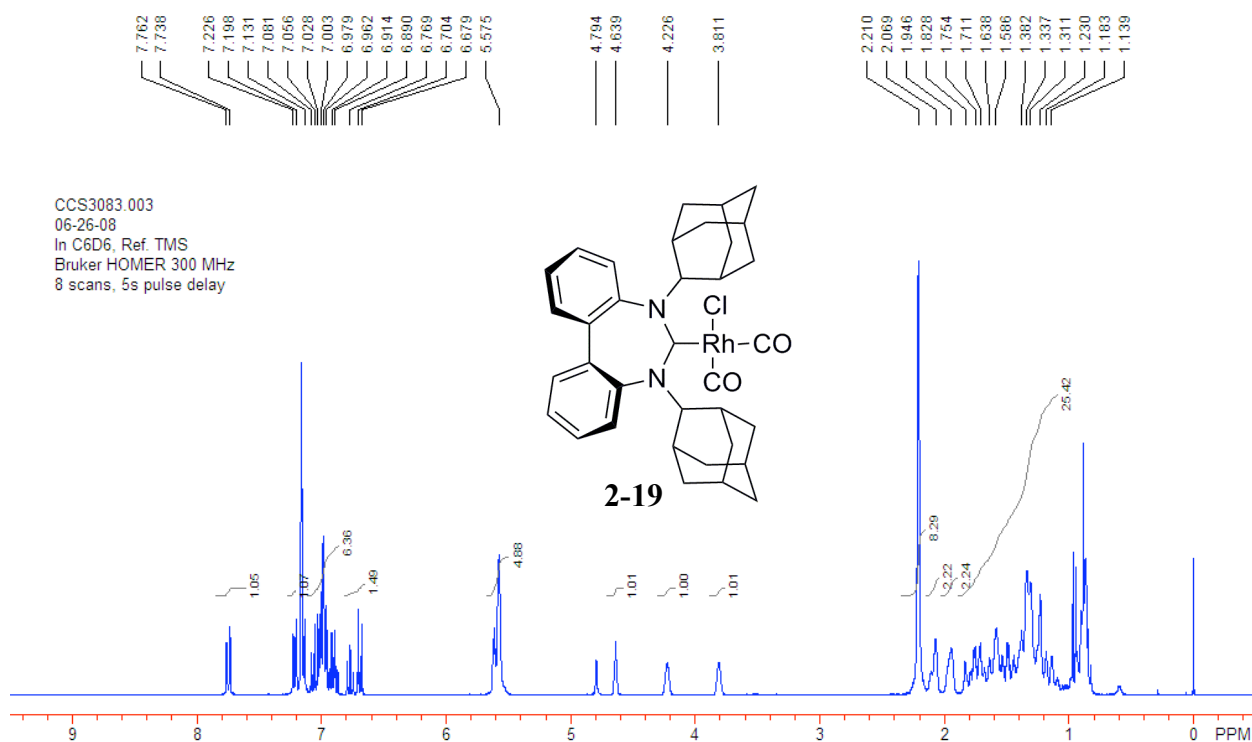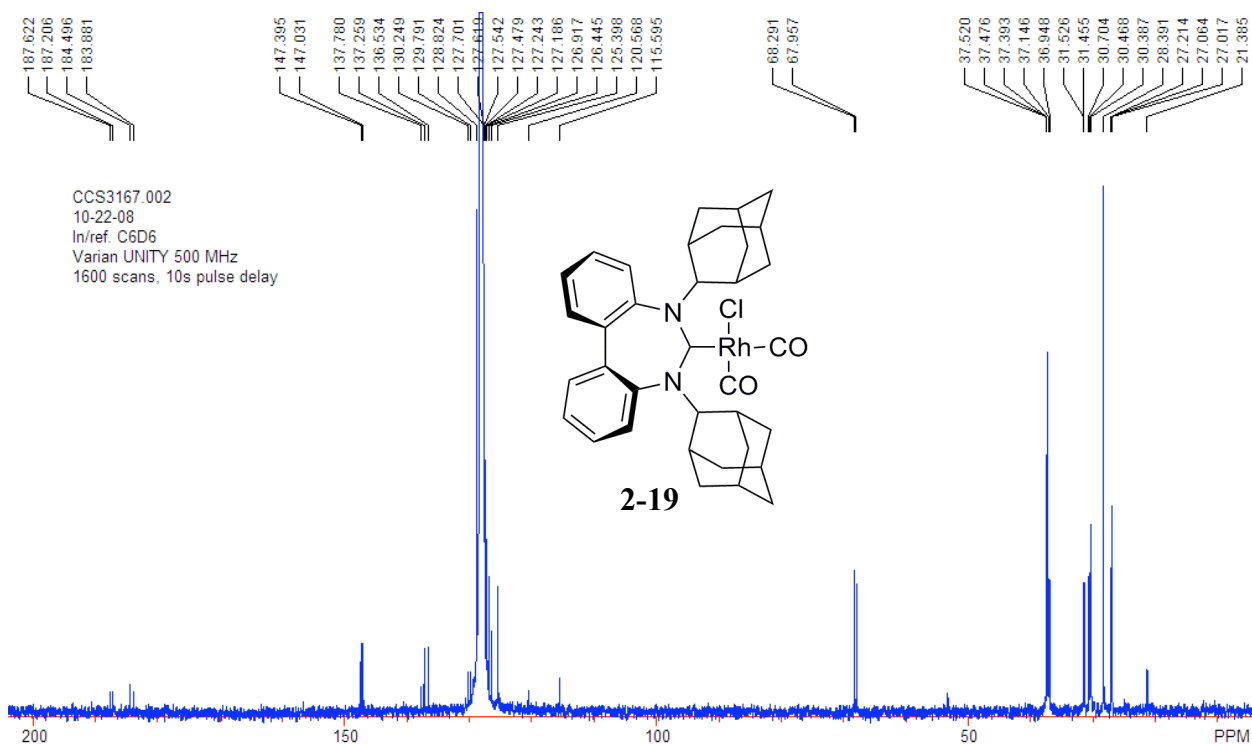



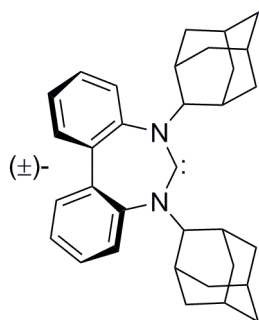

4.

#### **Data Collection**

A colorless crystal with approximate dimensions 0.38 x 0.10 x 0.10 mm<sup>3</sup> was selected under oil under ambient conditions and attached to the tip of a MiTeGen MicroMount<sup>®</sup>. The crystal was mounted in a stream of cold nitrogen at 100(2) K and centered in the X-ray beam by using a video camera.

The crystal evaluation and data collection were performed on a Bruker SMART APEXII diffractometer with Cu K $\alpha$  ( $\lambda = 1.54178 \text{ \AA}$ ) radiation and the diffractometer to crystal distance of 4.03 cm.

The initial cell constants were obtained from three series of  $\omega$  scans at different starting angles. Each series consisted of 50 frames collected at intervals of 0.5° in a 25° range about with the exposure time of 60 seconds per frame. The reflections were successfully indexed by an automated indexing routine built in the SMART program. The final cell constants were calculated from a set of 7705 strong reflections from the actual data collection.

The data were collected by using the full sphere data collection routine to survey the reciprocal space to the extent of a full sphere to a resolution of 0.83 Å. A total of 22130 data were harvested by collecting 15 sets of frames with 0.5° scans in with an exposure time 60-90 sec per frame. These highly redundant datasets were corrected for Lorentz and polarization effects. The absorption correction was based on fitting a function to the empirical transmission surface as sampled by multiple equivalent measurements.<sup>1</sup>

#### **Structure Solution and Refinement**

The systematic absences in the diffraction data were consistent for the space groups  $P1^-$  and  $P1$ . The  $E$ -statistics strongly suggested the centrosymmetric space group  $P1^-$  that yielded chemically reasonable and computationally stable results of refinement.<sup>2</sup>

A successful solution by the direct methods provided most non-hydrogen atoms from the  $E$ -map. The remaining non-hydrogen atoms were located in an alternating series of least-squares cycles and difference Fourier maps. All non-hydrogen atoms were refined with anisotropic 3 displacement coefficients. All hydrogen atoms were included in the structure factor calculation at idealized positions and were allowed to ride on the neighboring atoms with relative isotropic displacement coefficients.

There is also one molecule of solvate benzene per two molecules of carbene in the asymmetric unit. The two carbenes are enantiomers.

The only crystal large enough for the single-crystal X-ray diffraction experiment proved to be a non-merohedral twin with a 35.7(2)% second component contribution. The twin components are related by a 179.7° rotation about reciprocal axis [101].

The final least-squares refinement of 685 parameters against 9780 data resulted in residuals  $R$  (based on  $F^2$  for  $I \geq 2\sigma$ ) and  $wR$  (based on  $F^2$  for all data) of 0.0586 and 0.1399, respectively. The final difference Fourier map was featureless.

The molecular diagram is drawn with 40% probability ellipsoids.

## References

- (1) Bruker-AXS. (2007) APEX2, SADABS, and SAINT Software Reference Manuals. Bruker-AXS, Madison, Wisconsin, USA.
- (2) Sheldrick, G. M. (2008) SHELXL. *Acta Cryst.* **A64**, 112-122.

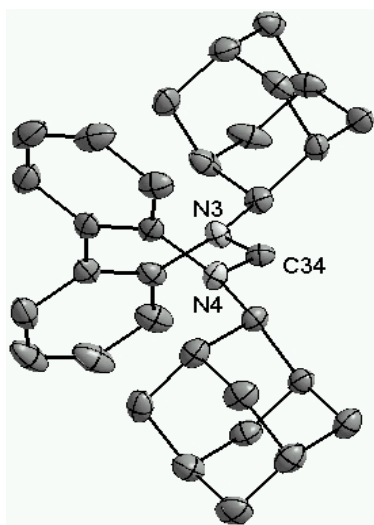

**Figure S1.** Solid-state structure of free NHC **4** (only one of two independent NHC molecules is shown). Hydrogen atoms and solvent molecule ( $C_6H_6$ ) are omitted for clarity. Thermal ellipsoids are shown at 40% probability.

**Table S1.** Crystal data and structure refinement for **4**.

|                      |                              |                               |
|----------------------|------------------------------|-------------------------------|
| Identification code  | <b>4</b>                     |                               |
| Empirical formula    | $C_{72} H_{82} N_4$          |                               |
| Formula weight       | 1003.42                      |                               |
| Temperature          | 100(2) K                     |                               |
| Wavelength           | 1.54178 Å                    |                               |
| Crystal system       | Triclinic                    |                               |
| Space group          | $P\bar{1}$                   |                               |
| Unit cell dimensions | $a = 11.1433(5)$ Å           | $\alpha = 99.512(3)^\circ$ .  |
|                      | $b = 13.6753(5)$ Å           | $\beta = 91.001(3)^\circ$ .   |
|                      | $c = 19.3610(8)$ Å           | $\gamma = 109.659(3)^\circ$ . |
| Volume               | $2731.72(19)$ Å <sup>3</sup> |                               |
| Z                    | 2                            |                               |
| Density (calculated) | 1.220 Mg/m <sup>3</sup>      |                               |

|                                   |                                             |
|-----------------------------------|---------------------------------------------|
| Absorption coefficient            | 0.528 mm <sup>-1</sup>                      |
| F(000)                            | 1084                                        |
| Crystal size                      | 0.14 x 0.03 x 0.03 mm <sup>3</sup>          |
| Theta range for data collection   | 3.49 to 68.03°.                             |
| Index ranges                      | -13<=h<=13, -16<=k<=16, 0<=l<=23            |
| Reflections collected             | 9780                                        |
| Independent reflections           | 9780 [R(int) = 0.0000]                      |
| Completeness to theta = 68.03°    | 98.0 %                                      |
| Absorption correction             | Empirical with SADABS                       |
| Max. and min. transmission        | 0.9843 and 0.9297                           |
| Refinement method                 | Full-matrix least-squares on F <sup>2</sup> |
| Data / restraints / parameters    | 9780 / 0 / 685                              |
| Twin component ratio              | 35.7(2)%                                    |
| Goodness-of-fit on F <sup>2</sup> | 1.006                                       |
| Final R indices [I>2sigma(I)]     | R1 = 0.0586, wR2 = 0.1225                   |
| R indices (all data)              | R1 = 0.1093, wR2 = 0.1399                   |
| Largest diff. peak and hole       | 0.222 and -0.225 e.Å <sup>-3</sup>          |

**Table S2.** Atomic coordinates ( x 10<sup>4</sup>) and equivalent isotropic displacement parameters (Å<sup>2</sup>x 10<sup>3</sup>) for **4**. U(eq) is defined as one third of the trace of the orthogonalized U<sup>ij</sup> tensor.

|       | x        | y       | z       | U(eq) |
|-------|----------|---------|---------|-------|
| N(1)  | 8953(2)  | 7511(1) | 4886(1) | 23(1) |
| N(2)  | 10598(2) | 7236(2) | 5435(1) | 25(1) |
| N(3)  | 3905(2)  | 1733(1) | -57(1)  | 23(1) |
| N(4)  | 5586(2)  | 3140(1) | 483(1)  | 22(1) |
| C(1)  | 10148(2) | 7428(2) | 4844(1) | 22(1) |
| C(2)  | 8770(2)  | 8205(2) | 5492(1) | 23(1) |
| C(3)  | 8713(2)  | 9187(2) | 5422(1) | 26(1) |
| C(4)  | 8579(2)  | 9870(2) | 6002(1) | 31(1) |
| C(5)  | 8504(2)  | 9584(2) | 6658(1) | 31(1) |
| C(6)  | 8569(2)  | 8611(2) | 6728(1) | 27(1) |
| C(7)  | 8709(2)  | 7912(2) | 6149(1) | 23(1) |
| C(8)  | 8800(2)  | 6874(2) | 6204(1) | 22(1) |
| C(9)  | 7968(2)  | 6188(2) | 6586(1) | 28(1) |
| C(10) | 8063(3)  | 5209(2) | 6615(1) | 33(1) |
| C(11) | 8982(2)  | 4906(2) | 6262(1) | 33(1) |
| C(12) | 9817(2)  | 5579(2) | 5887(1) | 28(1) |
| C(13) | 9738(2)  | 6567(2) | 5858(1) | 24(1) |
| C(14) | 8267(2)  | 7460(2) | 4207(1) | 21(1) |
| C(15) | 6850(2)  | 7330(2) | 4291(1) | 23(1) |
| C(16) | 6135(2)  | 6277(2) | 4514(1) | 29(1) |

|       |          |         |          |       |
|-------|----------|---------|----------|-------|
| C(17) | 6186(2)  | 5363(2) | 3952(1)  | 32(1) |
| C(18) | 7598(2)  | 5473(2) | 3895(1)  | 28(1) |
| C(19) | 8322(2)  | 6520(2) | 3664(1)  | 22(1) |
| C(20) | 7722(2)  | 6559(2) | 2960(1)  | 27(1) |
| C(21) | 6323(2)  | 6452(2) | 3022(1)  | 28(1) |
| C(22) | 6249(2)  | 7360(2) | 3581(1)  | 26(1) |
| C(23) | 5599(2)  | 5404(2) | 3244(2)  | 37(1) |
| C(24) | 11965(2) | 7303(2) | 5495(1)  | 23(1) |
| C(25) | 12501(2) | 7538(2) | 6262(1)  | 28(1) |
| C(26) | 12566(3) | 8634(2) | 6625(1)  | 37(1) |
| C(27) | 13446(3) | 9465(2) | 6245(2)  | 37(1) |
| C(28) | 12879(3) | 9258(2) | 5494(2)  | 36(1) |
| C(29) | 12813(2) | 8163(2) | 5122(1)  | 28(1) |
| C(30) | 14154(2) | 8096(2) | 5130(2)  | 37(1) |
| C(31) | 14719(3) | 8299(2) | 5887(2)  | 37(1) |
| C(32) | 13845(3) | 7474(2) | 6272(2)  | 42(1) |
| C(33) | 14790(3) | 9399(2) | 6247(2)  | 37(1) |
| C(34) | 5069(2)  | 2442(2) | -130(1)  | 23(1) |
| C(35) | 3724(2)  | 1288(2) | 575(1)   | 25(1) |
| C(36) | 3686(2)  | 253(2)  | 546(1)   | 34(1) |
| C(37) | 3579(3)  | -175(2) | 1148(2)  | 44(1) |
| C(38) | 3505(3)  | 420(2)  | 1785(2)  | 44(1) |
| C(39) | 3553(2)  | 1450(2) | 1816(1)  | 37(1) |
| C(40) | 3668(2)  | 1902(2) | 1213(1)  | 27(1) |
| C(41) | 3799(2)  | 3019(2) | 1230(1)  | 26(1) |
| C(42) | 2997(2)  | 3492(2) | 1582(1)  | 36(1) |
| C(43) | 3155(3)  | 4538(2) | 1574(1)  | 40(1) |
| C(44) | 4119(3)  | 5123(2) | 1210(1)  | 37(1) |
| C(45) | 4921(2)  | 4665(2) | 860(1)   | 29(1) |
| C(46) | 4766(2)  | 3615(2) | 872(1)   | 22(1) |
| C(47) | 3147(2)  | 1058(2) | -714(1)  | 24(1) |
| C(48) | 1736(2)  | 527(2)  | -586(1)  | 31(1) |
| C(49) | 1101(2)  | 1358(2) | -382(1)  | 36(1) |
| C(50) | 1156(2)  | 1974(2) | -976(1)  | 33(1) |
| C(51) | 2559(2)  | 2530(2) | -1089(1) | 29(1) |
| C(52) | 3207(2)  | 1712(2) | -1290(1) | 25(1) |
| C(53) | 2520(2)  | 965(2)  | -1966(1) | 32(1) |
| C(54) | 1122(2)  | 401(2)  | -1858(1) | 32(1) |
| C(55) | 1054(3)  | -224(2) | -1265(2) | 40(1) |
| C(56) | 475(2)   | 1221(2) | -1650(1) | 32(1) |
| C(57) | 6972(2)  | 3752(2) | 522(1)   | 22(1) |
| C(58) | 7501(2)  | 4338(2) | 1273(1)  | 25(1) |
| C(59) | 7358(2)  | 3555(2) | 1772(1)  | 29(1) |
| C(60) | 8114(2)  | 2825(2) | 1529(1)  | 31(1) |
| C(61) | 7573(2)  | 2219(2) | 790(1)   | 28(1) |
| C(62) | 7708(2)  | 2993(2) | 283(1)   | 24(1) |

|       |         |         |         |       |
|-------|---------|---------|---------|-------|
| C(63) | 9124(2) | 3643(2) | 273(1)  | 29(1) |
| C(64) | 9671(2) | 4258(2) | 1010(1) | 30(1) |
| C(65) | 8912(2) | 4984(2) | 1255(1) | 30(1) |
| C(66) | 9531(2) | 3479(2) | 1514(1) | 34(1) |
| C(67) | 3150(2) | 7460(2) | 1838(1) | 25(1) |
| C(68) | 3849(2) | 7790(2) | 2478(1) | 28(1) |
| C(69) | 3238(2) | 7868(2) | 3095(1) | 29(1) |
| C(70) | 1928(2) | 7608(2) | 3067(1) | 23(1) |
| C(71) | 1227(2) | 7280(2) | 2427(1) | 27(1) |
| C(72) | 1836(2) | 7200(2) | 1809(1) | 27(1) |

**Table S3.** Bond lengths [Å] and angles [°] for **4**.

|             |          |              |          |              |          |
|-------------|----------|--------------|----------|--------------|----------|
| N(1)-C(1)   | 1.377(3) | C(11)-H(11)  | 0.9500   | C(24)-C(25)  | 1.531(3) |
| N(1)-C(2)   | 1.444(3) | C(12)-C(13)  | 1.393(3) | C(24)-C(29)  | 1.534(3) |
| N(1)-C(14)  | 1.489(3) | C(12)-H(12)  | 0.9500   | C(24)-H(24)  | 1.0000   |
| N(2)-C(1)   | 1.342(3) | C(14)-C(19)  | 1.540(3) | C(25)-C(26)  | 1.525(3) |
| N(2)-C(13)  | 1.452(3) | C(14)-C(15)  | 1.542(3) | C(25)-C(32)  | 1.529(4) |
| N(2)-C(24)  | 1.496(3) | C(14)-H(14)  | 1.0000   | C(25)-H(25)  | 1.0000   |
| N(3)-C(34)  | 1.359(3) | C(15)-C(16)  | 1.529(3) | C(26)-C(27)  | 1.531(4) |
| N(3)-C(35)  | 1.442(3) | C(15)-C(22)  | 1.532(3) | C(26)-H(26A) | 0.9900   |
| N(3)-C(47)  | 1.494(3) | C(15)-H(15)  | 1.0000   | C(26)-H(26B) | 0.9900   |
| N(4)-C(34)  | 1.372(3) | C(16)-C(17)  | 1.533(3) | C(27)-C(28)  | 1.519(4) |
| N(4)-C(46)  | 1.444(3) | C(16)-H(16A) | 0.9900   | C(27)-C(33)  | 1.531(4) |
| N(4)-C(57)  | 1.483(3) | C(16)-H(16B) | 0.9900   | C(27)-H(27)  | 1.0000   |
| C(2)-C(7)   | 1.392(3) | C(17)-C(23)  | 1.527(4) | C(28)-C(29)  | 1.528(3) |
| C(2)-C(3)   | 1.394(3) | C(17)-C(18)  | 1.537(3) | C(28)-H(28A) | 0.9900   |
| C(3)-C(4)   | 1.382(3) | C(17)-H(17)  | 1.0000   | C(28)-H(28B) | 0.9900   |
| C(3)-H(3)   | 0.9500   | C(18)-C(19)  | 1.532(3) | C(29)-C(30)  | 1.527(3) |
| C(4)-C(5)   | 1.384(4) | C(18)-H(18A) | 0.9900   | C(29)-H(29)  | 1.0000   |
| C(4)-H(4)   | 0.9500   | C(18)-H(18B) | 0.9900   | C(30)-C(31)  | 1.530(4) |
| C(5)-C(6)   | 1.384(3) | C(19)-C(20)  | 1.525(3) | C(30)-H(30A) | 0.9900   |
| C(5)-H(5)   | 0.9500   | C(19)-H(19)  | 1.0000   | C(30)-H(30B) | 0.9900   |
| C(6)-C(7)   | 1.394(3) | C(20)-C(21)  | 1.525(3) | C(31)-C(33)  | 1.525(3) |
| C(6)-H(6)   | 0.9500   | C(20)-H(20A) | 0.9900   | C(31)-C(32)  | 1.529(4) |
| C(7)-C(8)   | 1.478(3) | C(20)-H(20B) | 0.9900   | C(31)-H(31)  | 1.0000   |
| C(8)-C(13)  | 1.394(3) | C(21)-C(23)  | 1.525(4) | C(32)-H(32A) | 0.9900   |
| C(8)-C(9)   | 1.398(3) | C(21)-C(22)  | 1.531(3) | C(32)-H(32B) | 0.9900   |
| C(9)-C(10)  | 1.389(3) | C(21)-H(21)  | 1.0000   | C(33)-H(33A) | 0.9900   |
| C(9)-H(9)   | 0.9500   | C(22)-H(22A) | 0.9900   | C(33)-H(33B) | 0.9900   |
| C(10)-C(11) | 1.380(4) | C(22)-H(22B) | 0.9900   | C(35)-C(40)  | 1.390(3) |
| C(10)-H(10) | 0.9500   | C(23)-H(23A) | 0.9900   | C(35)-C(36)  | 1.393(3) |
| C(11)-C(12) | 1.381(3) | C(23)-H(23B) | 0.9900   | C(36)-C(37)  | 1.378(4) |

|                  |            |                 |          |              |          |
|------------------|------------|-----------------|----------|--------------|----------|
| C(36)-H(36)      | 0.9500     | C(50)-C(56)     | 1.530(4) | C(60)-H(60)  | 1.0000   |
| C(37)-C(38)      | 1.380(4)   | C(50)-H(50)     | 1.0000   | C(61)-C(62)  | 1.533(3) |
| C(37)-H(37)      | 0.9500     | C(51)-C(52)     | 1.529(3) | C(61)-H(61A) | 0.9900   |
| C(38)-C(39)      | 1.383(4)   | C(51)-H(51A)    | 0.9900   | C(61)-H(61B) | 0.9900   |
| C(38)-H(38)      | 0.9500     | C(51)-H(51B)    | 0.9900   | C(62)-C(63)  | 1.531(3) |
| C(39)-C(40)      | 1.398(3)   | C(52)-C(53)     | 1.529(3) | C(62)-H(62)  | 1.0000   |
| C(39)-H(39)      | 0.9500     | C(52)-H(52)     | 1.0000   | C(63)-C(64)  | 1.531(3) |
| C(40)-C(41)      | 1.479(3)   | C(53)-C(54)     | 1.524(4) | C(63)-H(63A) | 0.9900   |
| C(41)-C(46)      | 1.389(3)   | C(53)-H(53A)    | 0.9900   | C(63)-H(63B) | 0.9900   |
| C(41)-C(42)      | 1.394(3)   | C(53)-H(53B)    | 0.9900   | C(64)-C(65)  | 1.532(3) |
| C(42)-C(43)      | 1.384(4)   | C(54)-C(55)     | 1.528(3) | C(64)-C(66)  | 1.532(3) |
| C(42)-H(42)      | 0.9500     | C(54)-C(56)     | 1.532(3) | C(64)-H(64)  | 1.0000   |
| C(43)-C(44)      | 1.388(4)   | C(54)-H(54)     | 1.0000   | C(65)-H(65A) | 0.9900   |
| C(43)-H(43)      | 0.9500     | C(55)-H(55A)    | 0.9900   | C(65)-H(65B) | 0.9900   |
| C(44)-C(45)      | 1.380(3)   | C(55)-H(55B)    | 0.9900   | C(66)-H(66A) | 0.9900   |
| C(44)-H(44)      | 0.9500     | C(56)-H(56A)    | 0.9900   | C(66)-H(66B) | 0.9900   |
| C(45)-C(46)      | 1.392(3)   | C(56)-H(56B)    | 0.9900   | C(67)-C(68)  | 1.375(3) |
| C(45)-H(45)      | 0.9500     | C(57)-C(58)     | 1.540(3) | C(67)-C(72)  | 1.383(3) |
| C(47)-C(52)      | 1.530(3)   | C(57)-C(62)     | 1.545(3) | C(67)-H(67)  | 0.9500   |
| C(47)-C(48)      | 1.538(3)   | C(57)-H(57)     | 1.0000   | C(68)-C(69)  | 1.393(3) |
| C(47)-H(47)      | 1.0000     | C(58)-C(65)     | 1.527(3) | C(68)-H(68)  | 0.9500   |
| C(48)-C(49)      | 1.534(4)   | C(58)-C(59)     | 1.529(3) | C(69)-C(70)  | 1.379(3) |
| C(48)-C(55)      | 1.536(4)   | C(58)-H(58)     | 1.0000   | C(69)-H(69)  | 0.9500   |
| C(48)-H(48)      | 1.0000     | C(59)-C(60)     | 1.533(3) | C(70)-C(71)  | 1.376(3) |
| C(49)-C(50)      | 1.525(4)   | C(59)-H(59A)    | 0.9900   | C(70)-H(70)  | 0.9500   |
| C(49)-H(49A)     | 0.9900     | C(59)-H(59B)    | 0.9900   | C(71)-C(72)  | 1.392(3) |
| C(49)-H(49B)     | 0.9900     | C(60)-C(61)     | 1.529(3) | C(71)-H(71)  | 0.9500   |
| C(50)-C(51)      | 1.529(3)   | C(60)-C(66)     | 1.534(3) | C(72)-H(72)  | 0.9500   |
| C(1)-N(1)-C(2)   | 116.92(19) | C(4)-C(3)-H(3)  | 119.9    |              |          |
| C(1)-N(1)-C(14)  | 115.94(18) | C(2)-C(3)-H(3)  | 119.9    |              |          |
| C(2)-N(1)-C(14)  | 117.18(17) | C(3)-C(4)-C(5)  | 120.2(2) |              |          |
| C(1)-N(2)-C(13)  | 120.40(19) | C(3)-C(4)-H(4)  | 119.9    |              |          |
| C(1)-N(2)-C(24)  | 118.18(19) | C(5)-C(4)-H(4)  | 119.9    |              |          |
| C(13)-N(2)-C(24) | 116.39(18) | C(4)-C(5)-C(6)  | 119.5(2) |              |          |
| C(34)-N(3)-C(35) | 118.35(19) | C(4)-C(5)-H(5)  | 120.3    |              |          |
| C(34)-N(3)-C(47) | 117.11(19) | C(6)-C(5)-H(5)  | 120.3    |              |          |
| C(35)-N(3)-C(47) | 117.23(17) | C(5)-C(6)-C(7)  | 121.2(2) |              |          |
| C(34)-N(4)-C(46) | 117.65(19) | C(5)-C(6)-H(6)  | 119.4    |              |          |
| C(34)-N(4)-C(57) | 116.63(18) | C(7)-C(6)-H(6)  | 119.4    |              |          |
| C(46)-N(4)-C(57) | 118.51(17) | C(2)-C(7)-C(6)  | 118.7(2) |              |          |
| N(2)-C(1)-N(1)   | 113.4(2)   | C(2)-C(7)-C(8)  | 118.4(2) |              |          |
| C(7)-C(2)-C(3)   | 120.1(2)   | C(6)-C(7)-C(8)  | 122.8(2) |              |          |
| C(7)-C(2)-N(1)   | 120.01(19) | C(13)-C(8)-C(9) | 119.2(2) |              |          |
| C(3)-C(2)-N(1)   | 119.8(2)   | C(13)-C(8)-C(7) | 118.9(2) |              |          |
| C(4)-C(3)-C(2)   | 120.2(2)   | C(9)-C(8)-C(7)  | 122.0(2) |              |          |

|                     |            |                     |            |
|---------------------|------------|---------------------|------------|
| C(10)-C(9)-C(8)     | 120.6(2)   | C(20)-C(19)-C(14)   | 108.41(18) |
| C(10)-C(9)-H(9)     | 119.7      | C(18)-C(19)-C(14)   | 110.68(18) |
| C(8)-C(9)-H(9)      | 119.7      | C(20)-C(19)-H(19)   | 109.3      |
| C(11)-C(10)-C(9)    | 119.8(2)   | C(18)-C(19)-H(19)   | 109.3      |
| C(11)-C(10)-H(10)   | 120.1      | C(14)-C(19)-H(19)   | 109.3      |
| C(9)-C(10)-H(10)    | 120.1      | C(19)-C(20)-C(21)   | 109.99(19) |
| C(10)-C(11)-C(12)   | 120.2(2)   | C(19)-C(20)-H(20A)  | 109.7      |
| C(10)-C(11)-H(11)   | 119.9      | C(21)-C(20)-H(20A)  | 109.7      |
| C(12)-C(11)-H(11)   | 119.9      | C(19)-C(20)-H(20B)  | 109.7      |
| C(11)-C(12)-C(13)   | 120.6(2)   | C(21)-C(20)-H(20B)  | 109.7      |
| C(11)-C(12)-H(12)   | 119.7      | H(20A)-C(20)-H(20B) | 108.2      |
| C(13)-C(12)-H(12)   | 119.7      | C(23)-C(21)-C(20)   | 109.6(2)   |
| C(12)-C(13)-C(8)    | 119.7(2)   | C(23)-C(21)-C(22)   | 109.2(2)   |
| C(12)-C(13)-N(2)    | 119.0(2)   | C(20)-C(21)-C(22)   | 108.9(2)   |
| C(8)-C(13)-N(2)     | 121.3(2)   | C(23)-C(21)-H(21)   | 109.7      |
| N(1)-C(14)-C(19)    | 110.17(17) | C(20)-C(21)-H(21)   | 109.7      |
| N(1)-C(14)-C(15)    | 111.77(18) | C(22)-C(21)-H(21)   | 109.7      |
| C(19)-C(14)-C(15)   | 108.24(18) | C(21)-C(22)-C(15)   | 110.31(18) |
| N(1)-C(14)-H(14)    | 108.9      | C(21)-C(22)-H(22A)  | 109.6      |
| C(19)-C(14)-H(14)   | 108.9      | C(15)-C(22)-H(22A)  | 109.6      |
| C(15)-C(14)-H(14)   | 108.9      | C(21)-C(22)-H(22B)  | 109.6      |
| C(16)-C(15)-C(22)   | 109.4(2)   | C(15)-C(22)-H(22B)  | 109.6      |
| C(16)-C(15)-C(14)   | 110.83(18) | H(22A)-C(22)-H(22B) | 108.1      |
| C(22)-C(15)-C(14)   | 108.02(18) | C(21)-C(23)-C(17)   | 109.7(2)   |
| C(16)-C(15)-H(15)   | 109.5      | C(21)-C(23)-H(23A)  | 109.7      |
| C(22)-C(15)-H(15)   | 109.5      | C(17)-C(23)-H(23A)  | 109.7      |
| C(14)-C(15)-H(15)   | 109.5      | C(21)-C(23)-H(23B)  | 109.7      |
| C(15)-C(16)-C(17)   | 109.70(19) | C(17)-C(23)-H(23B)  | 109.7      |
| C(15)-C(16)-H(16A)  | 109.7      | H(23A)-C(23)-H(23B) | 108.2      |
| C(17)-C(16)-H(16A)  | 109.7      | N(2)-C(24)-C(25)    | 112.00(19) |
| C(15)-C(16)-H(16B)  | 109.7      | N(2)-C(24)-C(29)    | 111.41(18) |
| C(17)-C(16)-H(16B)  | 109.7      | C(25)-C(24)-C(29)   | 108.23(19) |
| H(16A)-C(16)-H(16B) | 108.2      | N(2)-C(24)-H(24)    | 108.4      |
| C(23)-C(17)-C(16)   | 110.7(2)   | C(25)-C(24)-H(24)   | 108.4      |
| C(23)-C(17)-C(18)   | 109.7(2)   | C(29)-C(24)-H(24)   | 108.4      |
| C(16)-C(17)-C(18)   | 107.7(2)   | C(26)-C(25)-C(32)   | 109.4(2)   |
| C(23)-C(17)-H(17)   | 109.6      | C(26)-C(25)-C(24)   | 111.20(19) |
| C(16)-C(17)-H(17)   | 109.6      | C(32)-C(25)-C(24)   | 108.2(2)   |
| C(18)-C(17)-H(17)   | 109.6      | C(26)-C(25)-H(25)   | 109.3      |
| C(19)-C(18)-C(17)   | 109.51(19) | C(32)-C(25)-H(25)   | 109.3      |
| C(19)-C(18)-H(18A)  | 109.8      | C(24)-C(25)-H(25)   | 109.3      |
| C(17)-C(18)-H(18A)  | 109.8      | C(25)-C(26)-C(27)   | 109.4(2)   |
| C(19)-C(18)-H(18B)  | 109.8      | C(25)-C(26)-H(26A)  | 109.8      |
| C(17)-C(18)-H(18B)  | 109.8      | C(27)-C(26)-H(26A)  | 109.8      |
| H(18A)-C(18)-H(18B) | 108.2      | C(25)-C(26)-H(26B)  | 109.8      |
| C(20)-C(19)-C(18)   | 109.9(2)   | C(27)-C(26)-H(26B)  | 109.8      |

|                     |            |                   |            |
|---------------------|------------|-------------------|------------|
| H(26A)-C(26)-H(26B) | 108.3      | C(36)-C(35)-N(3)  | 119.2(2)   |
| C(28)-C(27)-C(33)   | 109.8(2)   | C(37)-C(36)-C(35) | 120.4(3)   |
| C(28)-C(27)-C(26)   | 108.0(2)   | C(37)-C(36)-H(36) | 119.8      |
| C(33)-C(27)-C(26)   | 110.7(2)   | C(35)-C(36)-H(36) | 119.8      |
| C(28)-C(27)-H(27)   | 109.4      | C(36)-C(37)-C(38) | 120.1(3)   |
| C(33)-C(27)-H(27)   | 109.4      | C(36)-C(37)-H(37) | 120.0      |
| C(26)-C(27)-H(27)   | 109.4      | C(38)-C(37)-H(37) | 120.0      |
| C(27)-C(28)-C(29)   | 109.8(2)   | C(37)-C(38)-C(39) | 119.7(3)   |
| C(27)-C(28)-H(28A)  | 109.7      | C(37)-C(38)-H(38) | 120.1      |
| C(29)-C(28)-H(28A)  | 109.7      | C(39)-C(38)-H(38) | 120.1      |
| C(27)-C(28)-H(28B)  | 109.7      | C(38)-C(39)-C(40) | 121.2(3)   |
| C(29)-C(28)-H(28B)  | 109.7      | C(38)-C(39)-H(39) | 119.4      |
| H(28A)-C(28)-H(28B) | 108.2      | C(40)-C(39)-H(39) | 119.4      |
| C(30)-C(29)-C(28)   | 109.5(2)   | C(35)-C(40)-C(39) | 118.4(2)   |
| C(30)-C(29)-C(24)   | 108.4(2)   | C(35)-C(40)-C(41) | 118.7(2)   |
| C(28)-C(29)-C(24)   | 110.83(19) | C(39)-C(40)-C(41) | 122.9(2)   |
| C(30)-C(29)-H(29)   | 109.4      | C(46)-C(41)-C(42) | 119.1(2)   |
| C(28)-C(29)-H(29)   | 109.4      | C(46)-C(41)-C(40) | 117.7(2)   |
| C(24)-C(29)-H(29)   | 109.4      | C(42)-C(41)-C(40) | 123.2(2)   |
| C(29)-C(30)-C(31)   | 110.0(2)   | C(43)-C(42)-C(41) | 120.8(3)   |
| C(29)-C(30)-H(30A)  | 109.7      | C(43)-C(42)-H(42) | 119.6      |
| C(31)-C(30)-H(30A)  | 109.7      | C(41)-C(42)-H(42) | 119.6      |
| C(29)-C(30)-H(30B)  | 109.7      | C(42)-C(43)-C(44) | 119.7(2)   |
| C(31)-C(30)-H(30B)  | 109.7      | C(42)-C(43)-H(43) | 120.2      |
| H(30A)-C(30)-H(30B) | 108.2      | C(44)-C(43)-H(43) | 120.2      |
| C(33)-C(31)-C(32)   | 109.5(2)   | C(45)-C(44)-C(43) | 120.2(2)   |
| C(33)-C(31)-C(30)   | 109.0(2)   | C(45)-C(44)-H(44) | 119.9      |
| C(32)-C(31)-C(30)   | 108.7(2)   | C(43)-C(44)-H(44) | 119.9      |
| C(33)-C(31)-H(31)   | 109.9      | C(44)-C(45)-C(46) | 120.1(2)   |
| C(32)-C(31)-H(31)   | 109.9      | C(44)-C(45)-H(45) | 120.0      |
| C(30)-C(31)-H(31)   | 109.9      | C(46)-C(45)-H(45) | 120.0      |
| C(31)-C(32)-C(25)   | 110.3(2)   | C(41)-C(46)-C(45) | 120.2(2)   |
| C(31)-C(32)-H(32A)  | 109.6      | C(41)-C(46)-N(4)  | 120.4(2)   |
| C(25)-C(32)-H(32A)  | 109.6      | C(45)-C(46)-N(4)  | 119.3(2)   |
| C(31)-C(32)-H(32B)  | 109.6      | N(3)-C(47)-C(52)  | 110.83(18) |
| C(25)-C(32)-H(32B)  | 109.6      | N(3)-C(47)-C(48)  | 111.52(19) |
| H(32A)-C(32)-H(32B) | 108.1      | C(52)-C(47)-C(48) | 108.4(2)   |
| C(31)-C(33)-C(27)   | 109.5(2)   | N(3)-C(47)-H(47)  | 108.7      |
| C(31)-C(33)-H(33A)  | 109.8      | C(52)-C(47)-H(47) | 108.7      |
| C(27)-C(33)-H(33A)  | 109.8      | C(48)-C(47)-H(47) | 108.7      |
| C(31)-C(33)-H(33B)  | 109.8      | C(49)-C(48)-C(55) | 109.8(2)   |
| C(27)-C(33)-H(33B)  | 109.8      | C(49)-C(48)-C(47) | 110.60(19) |
| H(33A)-C(33)-H(33B) | 108.2      | C(55)-C(48)-C(47) | 108.2(2)   |
| N(3)-C(34)-N(4)     | 112.3(2)   | C(49)-C(48)-H(48) | 109.4      |
| C(40)-C(35)-C(36)   | 120.2(2)   | C(55)-C(48)-H(48) | 109.4      |
| C(40)-C(35)-N(3)    | 120.5(2)   | C(47)-C(48)-H(48) | 109.4      |



|                     |            |                     |            |
|---------------------|------------|---------------------|------------|
| C(50)-C(49)-C(48)   | 109.6(2)   | C(54)-C(56)-H(56B)  | 109.7      |
| C(50)-C(49)-H(49A)  | 109.8      | H(56A)-C(56)-H(56B) | 108.2      |
| C(48)-C(49)-H(49A)  | 109.8      | N(4)-C(57)-C(58)    | 112.05(18) |
| C(50)-C(49)-H(49B)  | 109.8      | N(4)-C(57)-C(62)    | 109.37(17) |
| C(48)-C(49)-H(49B)  | 109.8      | C(58)-C(57)-C(62)   | 108.22(19) |
| H(49A)-C(49)-H(49B) | 108.2      | N(4)-C(57)-H(57)    | 109.0      |
| C(49)-C(50)-C(51)   | 108.5(2)   | C(58)-C(57)-H(57)   | 109.0      |
| C(49)-C(50)-C(56)   | 110.0(2)   | C(62)-C(57)-H(57)   | 109.0      |
| C(51)-C(50)-C(56)   | 109.7(2)   | C(65)-C(58)-C(59)   | 109.8(2)   |
| C(49)-C(50)-H(50)   | 109.6      | C(65)-C(58)-C(57)   | 108.24(19) |
| C(51)-C(50)-H(50)   | 109.6      | C(59)-C(58)-C(57)   | 110.64(19) |
| C(56)-C(50)-H(50)   | 109.6      | C(65)-C(58)-H(58)   | 109.4      |
| C(52)-C(51)-C(50)   | 109.75(19) | C(59)-C(58)-H(58)   | 109.4      |
| C(52)-C(51)-H(51A)  | 109.7      | C(57)-C(58)-H(58)   | 109.4      |
| C(50)-C(51)-H(51A)  | 109.7      | C(58)-C(59)-C(60)   | 109.75(19) |
| C(52)-C(51)-H(51B)  | 109.7      | C(58)-C(59)-H(59A)  | 109.7      |
| C(50)-C(51)-H(51B)  | 109.7      | C(60)-C(59)-H(59A)  | 109.7      |
| H(51A)-C(51)-H(51B) | 108.2      | C(58)-C(59)-H(59B)  | 109.7      |
| C(51)-C(52)-C(53)   | 109.0(2)   | C(60)-C(59)-H(59B)  | 109.7      |
| C(51)-C(52)-C(47)   | 111.21(19) | H(59A)-C(59)-H(59B) | 108.2      |
| C(53)-C(52)-C(47)   | 108.48(19) | C(61)-C(60)-C(59)   | 108.4(2)   |
| C(51)-C(52)-H(52)   | 109.4      | C(61)-C(60)-C(66)   | 109.5(2)   |
| C(53)-C(52)-H(52)   | 109.4      | C(59)-C(60)-C(66)   | 110.0(2)   |
| C(47)-C(52)-H(52)   | 109.4      | C(61)-C(60)-H(60)   | 109.6      |
| C(54)-C(53)-C(52)   | 110.3(2)   | C(59)-C(60)-H(60)   | 109.6      |
| C(54)-C(53)-H(53A)  | 109.6      | C(66)-C(60)-H(60)   | 109.6      |
| C(52)-C(53)-H(53A)  | 109.6      | C(60)-C(61)-C(62)   | 110.05(19) |
| C(54)-C(53)-H(53B)  | 109.6      | C(60)-C(61)-H(61A)  | 109.7      |
| C(52)-C(53)-H(53B)  | 109.6      | C(62)-C(61)-H(61A)  | 109.7      |
| H(53A)-C(53)-H(53B) | 108.1      | C(60)-C(61)-H(61B)  | 109.7      |
| C(53)-C(54)-C(55)   | 109.0(2)   | C(62)-C(61)-H(61B)  | 109.7      |
| C(53)-C(54)-C(56)   | 109.2(2)   | H(61A)-C(61)-H(61B) | 108.2      |
| C(55)-C(54)-C(56)   | 109.1(2)   | C(63)-C(62)-C(61)   | 109.0(2)   |
| C(53)-C(54)-H(54)   | 109.9      | C(63)-C(62)-C(57)   | 108.85(18) |
| C(55)-C(54)-H(54)   | 109.9      | C(61)-C(62)-C(57)   | 110.53(18) |
| C(56)-C(54)-H(54)   | 109.9      | C(63)-C(62)-H(62)   | 109.5      |
| C(54)-C(55)-C(48)   | 109.8(2)   | C(61)-C(62)-H(62)   | 109.5      |
| C(54)-C(55)-H(55A)  | 109.7      | C(57)-C(62)-H(62)   | 109.5      |
| C(48)-C(55)-H(55A)  | 109.7      | C(62)-C(63)-C(64)   | 110.1(2)   |
| C(54)-C(55)-H(55B)  | 109.7      | C(62)-C(63)-H(63A)  | 109.6      |
| C(48)-C(55)-H(55B)  | 109.7      | C(64)-C(63)-H(63A)  | 109.6      |
| H(55A)-C(55)-H(55B) | 108.2      | C(62)-C(63)-H(63B)  | 109.6      |
| C(50)-C(56)-C(54)   | 109.9(2)   | C(64)-C(63)-H(63B)  | 109.6      |
| C(50)-C(56)-H(56A)  | 109.7      | H(63A)-C(63)-H(63B) | 108.2      |
| C(54)-C(56)-H(56A)  | 109.7      | C(63)-C(64)-C(65)   | 108.6(2)   |
| C(50)-C(56)-H(56B)  | 109.7      | C(63)-C(64)-C(66)   | 109.3(2)   |

|                     |            |                   |          |
|---------------------|------------|-------------------|----------|
| C(65)-C(64)-C(66)   | 109.3(2)   | C(68)-C(67)-H(67) | 120.1    |
| C(63)-C(64)-H(64)   | 109.9      | C(72)-C(67)-H(67) | 120.1    |
| C(65)-C(64)-H(64)   | 109.9      | C(67)-C(68)-C(69) | 120.2(2) |
| C(66)-C(64)-H(64)   | 109.9      | C(67)-C(68)-H(68) | 119.9    |
| C(58)-C(65)-C(64)   | 110.55(19) | C(69)-C(68)-H(68) | 119.9    |
| C(58)-C(65)-H(65A)  | 109.5      | C(70)-C(69)-C(68) | 120.1(2) |
| C(64)-C(65)-H(65A)  | 109.5      | C(70)-C(69)-H(69) | 120.0    |
| C(58)-C(65)-H(65B)  | 109.5      | C(68)-C(69)-H(69) | 120.0    |
| C(64)-C(65)-H(65B)  | 109.5      | C(71)-C(70)-C(69) | 119.8(2) |
| H(65A)-C(65)-H(65B) | 108.1      | C(71)-C(70)-H(70) | 120.1    |
| C(64)-C(66)-C(60)   | 109.7(2)   | C(69)-C(70)-H(70) | 120.1    |
| C(64)-C(66)-H(66A)  | 109.7      | C(70)-C(71)-C(72) | 120.2(2) |
| C(60)-C(66)-H(66A)  | 109.7      | C(70)-C(71)-H(71) | 119.9    |
| C(64)-C(66)-H(66B)  | 109.7      | C(72)-C(71)-H(71) | 119.9    |
| C(60)-C(66)-H(66B)  | 109.7      | C(67)-C(72)-C(71) | 120.0(2) |
| H(66A)-C(66)-H(66B) | 108.2      | C(67)-C(72)-H(72) | 120.0    |
| C(68)-C(67)-C(72)   | 119.8(2)   | C(71)-C(72)-H(72) | 120.0    |

**Table S4.** Anisotropic displacement parameters ( $\text{\AA}^2 \times 10^3$ ) for **4**. The anisotropic displacement factor exponent takes the form:  $-2\pi^2[h^2 a^*2U^{11} + \dots + 2 h k a^* b^* U^{12}]$ .

|       | U11   | U22   | U33   | U23   | U13   | U12   |
|-------|-------|-------|-------|-------|-------|-------|
| N(1)  | 23(1) | 30(1) | 21(1) | 3(1)  | 1(1)  | 14(1) |
| N(2)  | 20(1) | 33(1) | 26(1) | 9(1)  | 4(1)  | 13(1) |
| N(3)  | 23(1) | 22(1) | 20(1) | 3(1)  | 0(1)  | 3(1)  |
| N(4)  | 20(1) | 21(1) | 23(1) | -1(1) | 3(1)  | 5(1)  |
| C(1)  | 21(1) | 21(1) | 22(1) | 1(1)  | -2(1) | 6(1)  |
| C(2)  | 20(1) | 27(1) | 22(1) | 1(1)  | 1(1)  | 10(1) |
| C(3)  | 24(1) | 27(1) | 28(1) | 4(1)  | -3(1) | 11(1) |
| C(4)  | 31(2) | 26(1) | 37(2) | -1(1) | -6(1) | 14(1) |
| C(5)  | 27(2) | 35(2) | 29(2) | -9(1) | -2(1) | 16(1) |
| C(6)  | 22(1) | 39(2) | 22(1) | 2(1)  | 2(1)  | 13(1) |
| C(7)  | 16(1) | 30(1) | 23(1) | 1(1)  | -1(1) | 10(1) |
| C(8)  | 20(1) | 29(1) | 18(1) | 4(1)  | -2(1) | 10(1) |
| C(9)  | 22(1) | 40(2) | 24(1) | 9(1)  | 4(1)  | 13(1) |
| C(10) | 30(2) | 37(2) | 34(2) | 17(1) | 3(1)  | 8(1)  |
| C(11) | 33(2) | 30(1) | 40(2) | 14(1) | -2(1) | 13(1) |
| C(12) | 27(1) | 35(1) | 29(1) | 7(1)  | -1(1) | 16(1) |
| C(13) | 22(1) | 30(1) | 20(1) | 6(1)  | 0(1)  | 10(1) |
| C(14) | 22(1) | 21(1) | 21(1) | 5(1)  | 2(1)  | 9(1)  |
| C(15) | 20(1) | 27(1) | 23(1) | 3(1)  | 1(1)  | 11(1) |
| C(16) | 20(1) | 36(1) | 34(2) | 12(1) | 11(1) | 12(1) |

|       |       |       |       |        |        |       |
|-------|-------|-------|-------|--------|--------|-------|
| C(17) | 25(2) | 22(1) | 48(2) | 8(1)   | 6(1)   | 5(1)  |
| C(18) | 26(1) | 24(1) | 34(1) | 1(1)   | 3(1)   | 12(1) |
| C(19) | 17(1) | 28(1) | 21(1) | 0(1)   | 1(1)   | 9(1)  |
| C(20) | 26(1) | 31(1) | 23(1) | 1(1)   | -1(1)  | 11(1) |
| C(21) | 24(1) | 38(2) | 23(1) | -1(1)  | -9(1)  | 14(1) |
| C(22) | 22(1) | 31(1) | 27(1) | 4(1)   | -1(1)  | 13(1) |
| C(23) | 24(2) | 35(2) | 49(2) | -4(1)  | -3(1)  | 10(1) |
| C(24) | 16(1) | 23(1) | 30(1) | -1(1)  | -2(1)  | 9(1)  |
| C(25) | 26(1) | 28(1) | 29(1) | 12(1)  | -5(1)  | 4(1)  |
| C(26) | 43(2) | 39(2) | 23(1) | -2(1)  | 1(1)   | 8(1)  |
| C(27) | 43(2) | 22(1) | 43(2) | 0(1)   | 0(1)   | 10(1) |
| C(28) | 29(2) | 33(2) | 51(2) | 23(1)  | 6(1)   | 11(1) |
| C(29) | 17(1) | 45(2) | 21(1) | 6(1)   | 2(1)   | 10(1) |
| C(30) | 17(1) | 46(2) | 42(2) | -3(1)  | 2(1)   | 8(1)  |
| C(31) | 24(1) | 30(1) | 56(2) | 7(1)   | -7(1)  | 9(1)  |
| C(32) | 32(2) | 30(2) | 62(2) | 17(1)  | -21(2) | 5(1)  |
| C(33) | 33(2) | 32(2) | 36(2) | 6(1)   | -9(1)  | -1(1) |
| C(34) | 20(1) | 24(1) | 25(1) | 4(1)   | -1(1)  | 8(1)  |
| C(35) | 19(1) | 27(1) | 25(1) | 8(1)   | -3(1)  | 2(1)  |
| C(36) | 29(2) | 25(1) | 39(2) | 8(1)   | -9(1)  | 0(1)  |
| C(37) | 40(2) | 36(2) | 49(2) | 22(1)  | -10(2) | -1(1) |
| C(38) | 29(2) | 55(2) | 41(2) | 30(2)  | -5(1)  | -3(1) |
| C(39) | 25(2) | 56(2) | 24(1) | 11(1)  | 1(1)   | 4(1)  |
| C(40) | 14(1) | 36(1) | 27(1) | 10(1)  | 2(1)   | 2(1)  |
| C(41) | 21(1) | 37(1) | 16(1) | -1(1)  | -3(1)  | 8(1)  |
| C(42) | 25(2) | 56(2) | 25(2) | 0(1)   | 2(1)   | 16(1) |
| C(43) | 31(2) | 56(2) | 33(2) | -13(1) | -6(1)  | 25(1) |
| C(44) | 35(2) | 35(2) | 40(2) | -10(1) | -11(1) | 19(1) |
| C(45) | 28(1) | 26(1) | 30(1) | -3(1)  | -7(1)  | 9(1)  |
| C(46) | 17(1) | 28(1) | 18(1) | -2(1)  | -3(1)  | 6(1)  |
| C(47) | 25(1) | 21(1) | 24(1) | -1(1)  | -1(1)  | 6(1)  |
| C(48) | 26(2) | 30(1) | 32(1) | 14(1)  | -4(1)  | 1(1)  |
| C(49) | 19(1) | 55(2) | 32(2) | 12(1)  | 6(1)   | 10(1) |
| C(50) | 31(2) | 35(2) | 36(2) | 4(1)   | 1(1)   | 18(1) |
| C(51) | 36(2) | 24(1) | 25(1) | 7(1)   | -4(1)  | 6(1)  |
| C(52) | 20(1) | 31(1) | 20(1) | 4(1)   | 1(1)   | 4(1)  |
| C(53) | 32(2) | 42(2) | 22(1) | -1(1)  | -2(1)  | 15(1) |
| C(54) | 30(2) | 28(1) | 32(2) | -2(1)  | -14(1) | 7(1)  |
| C(55) | 33(2) | 26(1) | 51(2) | 12(1)  | -20(1) | -1(1) |
| C(56) | 24(1) | 37(2) | 36(2) | 13(1)  | 0(1)   | 8(1)  |
| C(57) | 18(1) | 22(1) | 24(1) | 4(1)   | 2(1)   | 4(1)  |
| C(58) | 22(1) | 23(1) | 28(1) | 0(1)   | 3(1)   | 6(1)  |
| C(59) | 23(1) | 36(1) | 20(1) | -2(1)  | 0(1)   | 4(1)  |
| C(60) | 32(2) | 33(1) | 30(1) | 10(1)  | -2(1)  | 11(1) |
| C(61) | 25(1) | 25(1) | 32(1) | 2(1)   | 0(1)   | 10(1) |
| C(62) | 22(1) | 27(1) | 22(1) | 1(1)   | 0(1)   | 9(1)  |

|       |       |       |       |       |       |       |
|-------|-------|-------|-------|-------|-------|-------|
| C(63) | 22(1) | 31(1) | 32(1) | 2(1)  | 5(1)  | 9(1)  |
| C(64) | 19(1) | 30(1) | 36(2) | 2(1)  | 2(1)  | 5(1)  |
| C(65) | 24(1) | 27(1) | 32(2) | -3(1) | -3(1) | 6(1)  |
| C(66) | 28(2) | 39(2) | 32(2) | -1(1) | -8(1) | 10(1) |
| C(67) | 27(1) | 25(1) | 26(1) | 8(1)  | 7(1)  | 12(1) |
| C(68) | 21(1) | 34(1) | 30(1) | 6(1)  | 1(1)  | 10(1) |
| C(69) | 29(2) | 33(1) | 24(1) | 2(1)  | -3(1) | 11(1) |
| C(70) | 25(1) | 20(1) | 25(1) | 5(1)  | 7(1)  | 9(1)  |
| C(71) | 20(1) | 26(1) | 32(2) | 2(1)  | 1(1)  | 5(1)  |
| C(72) | 28(2) | 29(1) | 23(1) | 2(1)  | -3(1) | 8(1)  |

**Table S5.** Hydrogen coordinates ( $\times 10^4$ ) and isotropic displacement parameters ( $\text{\AA}^2 \times 10^3$ ) for **4**.

|        | x     | y     | z    | U(eq) |        |       |       |       |    |
|--------|-------|-------|------|-------|--------|-------|-------|-------|----|
| H(3)   | 8767  | 9388  | 4973 | 31    | H(27)  | 13492 | 10185 | 6484  | 45 |
| H(4)   | 8538  | 10537 | 5951 | 37    | H(28A) | 13414 | 9800  | 5240  | 43 |
| H(5)   | 8409  | 10052 | 7057 | 38    | H(28B) | 12010 | 9302  | 5493  | 43 |
| H(6)   | 8517  | 8416  | 7178 | 33    | H(29)  | 12457 | 8038  | 4625  | 33 |
| H(9)   | 7333  | 6394  | 6827 | 33    | H(30A) | 14709 | 8626  | 4874  | 45 |
| H(10)  | 7496  | 4748  | 6877 | 40    | H(30B) | 14115 | 7387  | 4888  | 45 |
| H(11)  | 9041  | 4232  | 6276 | 40    | H(31)  | 15593 | 8248  | 5891  | 44 |
| H(12)  | 10450 | 5367  | 5647 | 34    | H(32A) | 14199 | 7598  | 6764  | 50 |
| H(14)  | 8691  | 8128  | 4026 | 25    | H(32B) | 13805 | 6760  | 6042  | 50 |
| H(15)  | 6792  | 7924  | 4651 | 27    | H(33A) | 15346 | 9936  | 5997  | 44 |
| H(16A) | 5234  | 6215  | 4577 | 35    | H(33B) | 15165 | 9544  | 6737  | 44 |
| H(16B) | 6531  | 6247  | 4969 | 35    | H(36)  | 3735  | -160  | 109   | 40 |
| H(17)  | 5710  | 4676  | 4097 | 39    | H(37)  | 3555  | -881  | 1125  | 52 |
| H(18A) | 7980  | 5453  | 4356 | 33    | H(38)  | 3421  | 123   | 2199  | 53 |
| H(18B) | 7663  | 4877  | 3549 | 33    | H(39)  | 3507  | 1858  | 2256  | 45 |
| H(19)  | 9235  | 6580  | 3615 | 27    | H(42)  | 2335  | 3091  | 1830  | 43 |
| H(20A) | 7783  | 5979  | 2598 | 32    | H(43)  | 2606  | 4854  | 1817  | 49 |
| H(20B) | 8191  | 7237  | 2813 | 32    | H(44)  | 4228  | 5840  | 1201  | 44 |
| H(21)  | 5934  | 6482  | 2560 | 34    | H(45)  | 5580  | 5068  | 611   | 35 |
| H(22A) | 5344  | 7300  | 3625 | 31    | H(47)  | 3516  | 495   | -881  | 29 |
| H(22B) | 6705  | 8042  | 3436 | 31    | H(48)  | 1682  | 113   | -200  | 37 |
| H(23A) | 5645  | 4813  | 2886 | 45    | H(49A) | 199   | 1007  | -291  | 43 |
| H(23B) | 4689  | 5329  | 3280 | 45    | H(49B) | 1548  | 1847  | 53    | 43 |
| H(24)  | 12017 | 6608  | 5267 | 28    | H(50)  | 735   | 2512  | -844  | 39 |
| H(25)  | 11943 | 6997  | 6517 | 34    | H(51A) | 2616  | 2946  | -1468 | 35 |
| H(26A) | 12899 | 8763  | 7121 | 45    | H(51B) | 3000  | 3021  | -654  | 35 |
| H(26B) | 11699 | 8683  | 6616 | 45    | H(52)  | 4121  | 2079  | -1370 | 30 |

|        |       |      |       |    |
|--------|-------|------|-------|----|
| H(53A) | 2573  | 1373 | -2349 | 38 |
| H(53B) | 2941  | 439  | -2105 | 38 |
| H(54)  | 680   | -89  | -2301 | 38 |
| H(55A) | 1464  | -761 | -1396 | 47 |
| H(55B) | 149   | -595 | -1191 | 47 |
| H(56A) | 506   | 1626 | -2033 | 39 |
| H(56B) | -433  | 861  | -1577 | 39 |
| H(57)  | 7121  | 4278 | 202   | 26 |
| H(58)  | 7024  | 4823 | 1441  | 30 |
| H(59A) | 6444  | 3129 | 1778  | 34 |
| H(59B) | 7680  | 3943 | 2255  | 34 |
| H(60)  | 8023  | 2316 | 1857  | 37 |
| H(61A) | 6660  | 1793 | 799   | 33 |
| H(61B) | 8038  | 1732 | 627   | 33 |
| H(62)  | 7362  | 2590 | -200  | 28 |
| H(63A) | 9222  | 4142 | -56   | 34 |
| H(63B) | 9602  | 3167 | 107   | 34 |
| H(64)  | 10593 | 4688 | 1001  | 36 |
| H(65A) | 9261  | 5393 | 1730  | 36 |
| H(65B) | 9001  | 5489 | 931   | 36 |
| H(66A) | 9885  | 3871 | 1992  | 41 |
| H(66B) | 10015 | 3004 | 1358  | 41 |
| H(67)  | 3567  | 7410 | 1416  | 30 |
| H(68)  | 4751  | 7965 | 2499  | 33 |
| H(69)  | 3724  | 8100 | 3537  | 35 |
| H(70)  | 1510  | 7656 | 3488  | 28 |
| H(71)  | 326   | 7108 | 2406  | 33 |
| H(72)  | 1350  | 6967 | 1368  | 3  |

**Table S6.** Torsion angles [°] for **4**.

|                         |             |                         |             |
|-------------------------|-------------|-------------------------|-------------|
| C(13)-N(2)-C(1)-N(1)    | 35.7(3)     | C(19)-C(14)-C(15)-C(22) | -62.2(2)    |
| C(24)-N(2)-C(1)-N(1)    | -170.25(19) | C(22)-C(15)-C(16)-C(17) | 58.2(2)     |
| C(2)-N(1)-C(1)-N(2)     | 49.6(3)     | C(14)-C(15)-C(16)-C(17) | -60.8(3)    |
| C(14)-N(1)-C(1)-N(2)    | -165.62(18) | C(15)-C(16)-C(17)-C(23) | -58.5(3)    |
| C(1)-N(1)-C(2)-C(7)     | -72.3(3)    | C(15)-C(16)-C(17)-C(18) | 61.5(3)     |
| C(14)-N(1)-C(2)-C(7)    | 143.3(2)    | C(23)-C(17)-C(18)-C(19) | 58.9(3)     |
| C(1)-N(1)-C(2)-C(3)     | 104.8(3)    | C(16)-C(17)-C(18)-C(19) | -61.6(3)    |
| C(14)-N(1)-C(2)-C(3)    | -39.5(3)    | C(17)-C(18)-C(19)-C(20) | -58.6(2)    |
| C(7)-C(2)-C(3)-C(4)     | -0.8(4)     | C(17)-C(18)-C(19)-C(14) | 61.1(3)     |
| N(1)-C(2)-C(3)-C(4)     | -178.0(2)   | N(1)-C(14)-C(19)-C(20)  | -174.66(18) |
| C(2)-C(3)-C(4)-C(5)     | 0.2(4)      | C(15)-C(14)-C(19)-C(20) | 62.8(2)     |
| C(3)-C(4)-C(5)-C(6)     | 0.2(4)      | N(1)-C(14)-C(19)-C(18)  | 64.8(2)     |
| C(4)-C(5)-C(6)-C(7)     | 0.0(4)      | C(15)-C(14)-C(19)-C(18) | -57.7(2)    |
| C(3)-C(2)-C(7)-C(6)     | 1.0(3)      | C(18)-C(19)-C(20)-C(21) | 59.2(2)     |
| N(1)-C(2)-C(7)-C(6)     | 178.2(2)    | C(14)-C(19)-C(20)-C(21) | -61.8(2)    |
| C(3)-C(2)-C(7)-C(8)     | -178.7(2)   | C(19)-C(20)-C(21)-C(23) | -59.8(3)    |
| N(1)-C(2)-C(7)-C(8)     | -1.5(3)     | C(19)-C(20)-C(21)-C(22) | 59.6(2)     |
| C(5)-C(6)-C(7)-C(2)     | -0.6(4)     | C(23)-C(21)-C(22)-C(15) | 60.1(3)     |
| C(5)-C(6)-C(7)-C(8)     | 179.1(2)    | C(20)-C(21)-C(22)-C(15) | -59.5(3)    |
| C(2)-C(7)-C(8)-C(13)    | 45.2(3)     | C(16)-C(15)-C(22)-C(21) | -59.7(2)    |
| C(6)-C(7)-C(8)-C(13)    | -134.5(2)   | C(14)-C(15)-C(22)-C(21) | 61.0(2)     |
| C(2)-C(7)-C(8)-C(9)     | -134.1(2)   | C(20)-C(21)-C(23)-C(17) | 60.0(3)     |
| C(6)-C(7)-C(8)-C(9)     | 46.2(3)     | C(22)-C(21)-C(23)-C(17) | -59.2(3)    |
| C(13)-C(8)-C(9)-C(10)   | -0.7(4)     | C(16)-C(17)-C(23)-C(21) | 59.0(3)     |
| C(7)-C(8)-C(9)-C(10)    | 178.7(2)    | C(18)-C(17)-C(23)-C(21) | -59.7(2)    |
| C(8)-C(9)-C(10)-C(11)   | -0.3(4)     | C(1)-N(2)-C(24)-C(25)   | 155.6(2)    |
| C(9)-C(10)-C(11)-C(12)  | 0.8(4)      | C(13)-N(2)-C(24)-C(25)  | -49.4(3)    |
| C(10)-C(11)-C(12)-C(13) | -0.3(4)     | C(1)-N(2)-C(24)-C(29)   | 34.2(3)     |
| C(11)-C(12)-C(13)-C(8)  | -0.7(4)     | C(13)-N(2)-C(24)-C(29)  | -170.77(19) |
| C(11)-C(12)-C(13)-N(2)  | -177.6(2)   | N(2)-C(24)-C(25)-C(26)  | -65.8(3)    |
| C(9)-C(8)-C(13)-C(12)   | 1.2(4)      | C(29)-C(24)-C(25)-C(26) | 57.4(3)     |
| C(7)-C(8)-C(13)-C(12)   | -178.2(2)   | N(2)-C(24)-C(25)-C(32)  | 174.04(18)  |
| C(9)-C(8)-C(13)-N(2)    | 178.0(2)    | C(29)-C(24)-C(25)-C(32) | -62.8(2)    |
| C(7)-C(8)-C(13)-N(2)    | -1.4(3)     | C(32)-C(25)-C(26)-C(27) | 58.9(3)     |
| C(1)-N(2)-C(13)-C(12)   | 110.6(3)    | C(24)-C(25)-C(26)-C(27) | -60.5(3)    |
| C(24)-N(2)-C(13)-C(12)  | -43.8(3)    | C(25)-C(26)-C(27)-C(28) | 61.2(3)     |
| C(1)-N(2)-C(13)-C(8)    | -66.2(3)    | C(25)-C(26)-C(27)-C(33) | -59.1(3)    |
| C(24)-N(2)-C(13)-C(8)   | 139.3(2)    | C(33)-C(27)-C(28)-C(29) | 59.4(3)     |
| C(1)-N(1)-C(14)-C(19)   | 47.9(3)     | C(26)-C(27)-C(28)-C(29) | -61.4(3)    |
| C(2)-N(1)-C(14)-C(19)   | -167.47(18) | C(27)-C(28)-C(29)-C(30) | -58.9(3)    |
| C(1)-N(1)-C(14)-C(15)   | 168.25(19)  | C(27)-C(28)-C(29)-C(24) | 60.6(3)     |
| C(2)-N(1)-C(14)-C(15)   | -47.1(3)    | N(2)-C(24)-C(29)-C(30)  | -173.34(19) |
| N(1)-C(14)-C(15)-C(16)  | -63.9(2)    | C(25)-C(24)-C(29)-C(30) | 63.1(2)     |
| C(19)-C(14)-C(15)-C(16) | 57.6(2)     | N(2)-C(24)-C(29)-C(28)  | 66.5(3)     |
| N(1)-C(14)-C(15)-C(22)  | 176.27(17)  | C(25)-C(24)-C(29)-C(28) | -57.1(2)    |
|                         |             | C(28)-C(29)-C(30)-C(31) | 59.4(3)     |

|                         |             |                         |             |
|-------------------------|-------------|-------------------------|-------------|
| C(24)-C(29)-C(30)-C(31) | -61.6(3)    | C(36)-C(35)-C(40)-C(39) | -1.0(4)     |
| C(29)-C(30)-C(31)-C(33) | -60.1(3)    | N(3)-C(35)-C(40)-C(39)  | -177.0(2)   |
| C(29)-C(30)-C(31)-C(32) | 59.1(3)     | C(36)-C(35)-C(40)-C(41) | 175.9(2)    |
| C(33)-C(31)-C(32)-C(25) | 59.8(3)     | N(3)-C(35)-C(40)-C(41)  | -0.1(3)     |
| C(30)-C(31)-C(32)-C(25) | -59.1(3)    | C(38)-C(39)-C(40)-C(35) | 0.5(4)      |
| C(26)-C(25)-C(32)-C(31) | -60.0(3)    | C(38)-C(39)-C(40)-C(41) | -176.3(2)   |
| C(24)-C(25)-C(32)-C(31) | 61.3(3)     | C(35)-C(40)-C(41)-C(46) | -45.4(3)    |
| C(32)-C(31)-C(33)-C(27) | -58.7(3)    | C(39)-C(40)-C(41)-C(46) | 131.4(3)    |
| C(30)-C(31)-C(33)-C(27) | 60.1(3)     | C(35)-C(40)-C(41)-C(42) | 134.2(3)    |
| C(28)-C(27)-C(33)-C(31) | -60.2(3)    | C(39)-C(40)-C(41)-C(42) | -49.1(4)    |
| C(26)-C(27)-C(33)-C(31) | 58.9(3)     | C(46)-C(41)-C(42)-C(43) | 0.3(4)      |
| C(35)-N(3)-C(34)-N(4)   | -41.1(3)    | C(40)-C(41)-C(42)-C(43) | -179.3(2)   |
| C(47)-N(3)-C(34)-N(4)   | 169.52(19)  | C(41)-C(42)-C(43)-C(44) | 0.2(4)      |
| C(46)-N(4)-C(34)-N(3)   | -46.1(3)    | C(42)-C(43)-C(44)-C(45) | -0.3(4)     |
| C(57)-N(4)-C(34)-N(3)   | 163.97(18)  | C(43)-C(44)-C(45)-C(46) | -0.1(4)     |
| C(34)-N(3)-C(35)-C(40)  | 71.1(3)     | C(42)-C(41)-C(46)-C(45) | -0.7(3)     |
| C(47)-N(3)-C(35)-C(40)  | -139.5(2)   | C(40)-C(41)-C(46)-C(45) | 178.9(2)    |
| C(34)-N(3)-C(35)-C(36)  | -104.9(3)   | C(42)-C(41)-C(46)-N(4)  | -177.9(2)   |
| C(47)-N(3)-C(35)-C(36)  | 44.4(3)     | C(40)-C(41)-C(46)-N(4)  | 1.6(3)      |
| C(40)-C(35)-C(36)-C(37) | 0.7(4)      | C(44)-C(45)-C(46)-C(41) | 0.6(4)      |
| N(3)-C(35)-C(36)-C(37)  | 176.8(2)    | C(44)-C(45)-C(46)-N(4)  | 177.9(2)    |
| C(35)-C(36)-C(37)-C(38) | 0.1(4)      | C(34)-N(4)-C(46)-C(41)  | 71.9(3)     |
| C(36)-C(37)-C(38)-C(39) | -0.7(4)     | C(57)-N(4)-C(46)-C(41)  | -138.8(2)   |
| C(37)-C(38)-C(39)-C(40) | 0.4(4)      |                         |             |
| C(34)-N(4)-C(46)-C(45)  | -105.4(2)   | C(51)-C(52)-C(53)-C(54) | -60.1(3)    |
| C(57)-N(4)-C(46)-C(45)  | 43.9(3)     | C(47)-C(52)-C(53)-C(54) | 61.1(3)     |
| C(34)-N(3)-C(47)-C(52)  | -43.2(3)    | C(52)-C(53)-C(54)-C(55) | -59.3(3)    |
| C(35)-N(3)-C(47)-C(52)  | 167.11(19)  | C(52)-C(53)-C(54)-C(56) | 59.8(3)     |
| C(34)-N(3)-C(47)-C(48)  | -164.06(19) | C(53)-C(54)-C(55)-C(48) | 59.4(3)     |
| C(35)-N(3)-C(47)-C(48)  | 46.2(3)     | C(56)-C(54)-C(55)-C(48) | -59.7(3)    |
| N(3)-C(47)-C(48)-C(49)  | 64.5(3)     | C(49)-C(48)-C(55)-C(54) | 59.5(3)     |
| C(52)-C(47)-C(48)-C(49) | -57.7(3)    | C(47)-C(48)-C(55)-C(54) | -61.3(3)    |
| N(3)-C(47)-C(48)-C(55)  | -175.11(18) | C(49)-C(50)-C(56)-C(54) | -59.9(3)    |
| C(52)-C(47)-C(48)-C(55) | 62.6(2)     | C(51)-C(50)-C(56)-C(54) | 59.3(3)     |
| C(55)-C(48)-C(49)-C(50) | -58.7(3)    | C(53)-C(54)-C(56)-C(50) | -59.1(3)    |
| C(47)-C(48)-C(49)-C(50) | 60.6(3)     | C(55)-C(54)-C(56)-C(50) | 59.9(3)     |
| C(48)-C(49)-C(50)-C(51) | -60.9(3)    | C(34)-N(4)-C(57)-C(58)  | -168.73(19) |
| C(48)-C(49)-C(50)-C(56) | 59.0(3)     | C(46)-N(4)-C(57)-C(58)  | 41.6(3)     |
| C(49)-C(50)-C(51)-C(52) | 60.4(3)     | C(34)-N(4)-C(57)-C(62)  | -48.7(3)    |
| C(56)-C(50)-C(51)-C(52) | -59.7(3)    | C(46)-N(4)-C(57)-C(62)  | 161.60(19)  |
| C(50)-C(51)-C(52)-C(53) | 59.7(3)     | N(4)-C(57)-C(58)-C(65)  | -177.38(18) |
| C(50)-C(51)-C(52)-C(47) | -59.8(3)    | C(62)-C(57)-C(58)-C(65) | 61.9(2)     |
| N(3)-C(47)-C(52)-C(51)  | -65.2(2)    | N(4)-C(57)-C(58)-C(59)  | 62.3(2)     |
| C(48)-C(47)-C(52)-C(51) | 57.5(2)     | C(62)-C(57)-C(58)-C(59) | -58.4(2)    |
| N(3)-C(47)-C(52)-C(53)  | 174.94(19)  | C(65)-C(58)-C(59)-C(60) | -58.5(3)    |
| C(48)-C(47)-C(52)-C(53) | -62.4(2)    | C(57)-C(58)-C(59)-C(60) | 60.9(3)     |

|                         |            |                         |          |
|-------------------------|------------|-------------------------|----------|
| C(58)-C(59)-C(60)-C(61) | -60.7(3)   | C(57)-C(58)-C(65)-C(64) | -61.7(3) |
| C(58)-C(59)-C(60)-C(66) | 59.1(3)    | C(63)-C(64)-C(65)-C(58) | 59.8(3)  |
| C(59)-C(60)-C(61)-C(62) | 60.4(3)    | C(66)-C(64)-C(65)-C(58) | -59.3(3) |
| C(66)-C(60)-C(61)-C(62) | -59.7(3)   | C(63)-C(64)-C(66)-C(60) | -59.6(3) |
| C(60)-C(61)-C(62)-C(63) | 59.5(2)    | C(65)-C(64)-C(66)-C(60) | 59.1(3)  |
| C(60)-C(61)-C(62)-C(57) | -60.1(3)   | C(61)-C(60)-C(66)-C(64) | 59.5(3)  |
| N(4)-C(57)-C(62)-C(63)  | 175.80(19) | C(59)-C(60)-C(66)-C(64) | -59.5(3) |
| C(58)-C(57)-C(62)-C(63) | -61.9(2)   | C(72)-C(67)-C(68)-C(69) | -0.3(3)  |
| N(4)-C(57)-C(62)-C(61)  | -64.5(2)   | C(67)-C(68)-C(69)-C(70) | 0.4(3)   |
| C(58)-C(57)-C(62)-C(61) | 57.8(2)    | C(68)-C(69)-C(70)-C(71) | -0.5(3)  |
| C(61)-C(62)-C(63)-C(64) | -59.7(2)   | C(69)-C(70)-C(71)-C(72) | 0.6(3)   |
| C(57)-C(62)-C(63)-C(64) | 60.9(2)    | C(68)-C(67)-C(72)-C(71) | 0.4(3)   |
| C(62)-C(63)-C(64)-C(65) | -59.1(3)   | C(70)-C(71)-C(72)-C(67) | -0.6(3)  |
| C(62)-C(63)-C(64)-C(66) | 60.0(3)    |                         |          |
| C(59)-C(58)-C(65)-C(64) | 59.1(3)    |                         |          |

---
